Kovács et al. 2021

1 **OSBP-mediated cholesterol transfer determines epithelial polarity and**  
2 **associated cargo secretion**

3  
4  
5 *Title character count (with spaces): 96/100*

6  
7 Dávid Kovács<sup>1</sup>, Anne-Sophie Gay<sup>1</sup>, Lucile Fleuriot<sup>1</sup>, Delphine Debayle<sup>1</sup>, Ana Rita Dias Araújo<sup>1</sup>,  
8 Amanda Patel<sup>1</sup>, Bruno Mesmin<sup>1</sup>, Frédéric Luton<sup>1</sup>, Bruno Antony<sup>1,\*</sup>

9  
10 <sup>1</sup>CNRS, Université Côte d'Azur, Institut de Pharmacologie Moléculaire et Cellulaire, Valbonne, France

11 \*Corresponding author and lead contact: [antony@ipmc.cnrs.fr](mailto:antony@ipmc.cnrs.fr)

12  
13 **Abstract**

14 *word count: 162/175*

15  
16 Golgi lipid environment regulates sorting and cargo secretion. However, the mechanisms that  
17 spatiotemporally control the lipid composition of the secretory membranes to drive cargo  
18 trafficking are poorly understood. Lipid transfer proteins regulate the concentration of specific  
19 lipids at membrane contact sites. We hypothesised that by catalysing cholesterol/PI(4)P  
20 exchange at ER-*trans*-Golgi membrane contact sites the lipid transfer protein oxysterol binding  
21 protein (OSBP) affects the secretion of a subset of cargoes. Here, we report that OSBP is a  
22 major epithelial protein as its inhibition leads to complete loss of apico-basal polarity. By  
23 mapping the OSBP proximity proteome with the biotin ligase TurboID, we found that OSBP  
24 controls the secretion of multiple membrane associated proteins, including key polarity  
25 determinants such as E-cadherin. Mechanistically, we established that OSBP contributes to  
26 E-cadherin secretion by supplying cholesterol to post-Golgi membranes. Importantly, when  
27 cells downregulate cell-cell junctions upon epithelial-to-mesenchymal transition, they re-wire  
28 their lipid homeostasis and downregulate OSBP as well, thus altering the trafficking of the  
29 OSBP-dependent secretory cargoes.

30  
31  
32  
33  
34  
35 **Keywords:** Membrane contact sites, Lipid transfer proteins, cargo secretion, OSBP, cell  
36 polarity, EMT

Kovács et al. 2021

## 1 Introduction

2 In eukaryotic cells, the Golgi apparatus is responsible for the sorting and the secretion of about  
3 30% of the neosynthesized proteins (Boncompain & Weigel, 2018). Although Golgi sorting  
4 signals and their recognizing machineries are well-characterised, the molecular mechanisms  
5 of clustered cargo secretion are still largely unknown (Ramazanov et al., 2021; Boncompain &  
6 Weigel, 2018). It has already been long recognised that lipid environment affects protein  
7 secretion (Keller & Simons, 1997, 1998). Indeed, lipid composition defines the biophysical  
8 properties of the membranes, which might facilitate the formation of different Golgi sub-  
9 domains and the recruitment of various proteins leading to the assembly of cargo-specific  
10 trafficking machineries (Blume & Hausser, 2019; Klemm et al., 2009). However, our  
11 understanding of the link between lipid composition and membrane trafficking has remained  
12 fragmental due to the difficulty in tuning specifically and locally the lipid composition of  
13 organelles.

14 Recent advances in the characterization of membrane contact sites (MCS) offer new strategies  
15 to study the impact of lipid composition on membrane traffic steps. MCS, which are regions of  
16 close apposition between organelles, are enriched in lipid transfer proteins (Wu et al., 2018).  
17 Oxysterol binding protein (OSBP) – a member of the OSBP-related protein family (ORPs) – is  
18 recruited to the ER-Golgi MCS to transfer cholesterol from the ER towards the *trans*-Golgi  
19 network (TGN), thereby controlling the lipid composition of the *trans*-Golgi secretory  
20 membranes (Mesmin et al., 2013, 2019). This transfer activity requires the biochemical energy  
21 of the lipid phosphatidylinositol-4-phosphate (PI(4)P), which has an unequally distributed  
22 concentration between ER and Golgi membranes (Antonny et al., 2018; Mesmin et al., 2013,  
23 2017). While PI(4)P concentration is high in the *trans*-Golgi due to the activity of Golgi-resident  
24 PI4-kinases, it is degraded in the ER by the phosphatase Sac-1. When OSBP transfers a  
25 cholesterol molecule to the Golgi, it extracts a PI(4)P from the Golgi membrane and transfers  
26 it towards the ER. Thus, cholesterol is exchanged for PI(4)P during OSBP-mediated lipid  
27 transfer (Mesmin et al., 2013, 2017). Because cholesterol and PI(4)P are recognised as major  
28 lipids controlling trafficking and secretion (Blume & Hausser, 2019; Dukhovny et al., 2009;  
29 Sugiki et al., 2012), OSBP might affect the trafficking route of cargoes that depend on the local  
30 amount of these lipids.

31 OSBP deletion in mice is lethal at early stages of embryogenesis demonstrating its essential  
32 function (Brown and Goldstein, personal communication). Indeed, OSBP is highly expressed  
33 in most human tissues, and the fact that virtually all of our cells are able to synthesise and  
34 distribute cholesterol suggests that OSBP-catalysed lipid transfer is universal in the body.  
35 However, OSBP targeting drugs such as Schweinfurthin G (SWG) trigger cytotoxicity in a cell  
36 line-specific manner with cell line sensitivity to SWG being inversely proportional to cellular  
37 OSBP levels (Burgett et al., 2011; Péresse et al., 2020; Rajapakse et al., 2018). These

Kovács et al. 2021

1 variations in OSBP expression levels and sensitivity to OSBP-specific drugs suggest that cells  
2 with distinct phenotypes might require different amounts and/or activity of OSBP. However, it  
3 is unclear which cell types need elevated OSBP and for which functions.

4 Epithelial cells line the surfaces of our body and are differentiated to form tightly-connected  
5 cellular sheets that act as biological barriers. To achieve this function, epithelial cells are  
6 polarized on their apico-basal axis and express high levels of cell junction components such  
7 as cadherins (Du et al., 2010; Moreno-Bueno et al., 2006; Shigetomi & Ikenouchi, 2019). On  
8 the other hand, mesenchymal cells are not polarised on an apico-basal axis and due to  
9 differences in cadherin expression, they are not able to form stable cell-cell junctions, which  
10 allows them to gain migratory potentials and leave their original environment (McFaline-  
11 Figueroa et al., 2019). The process by which an epithelial cell gradually loses its phenotype  
12 and acquires mesenchymal features is referred to as epithelial-to-mesenchymal transition  
13 (EMT) (Carmona et al., 2014; Karimi Roshan et al., 2019; Loh et al., 2019). Although the EMT  
14 program is part of many physiological processes such as embryonic development or wound  
15 healing, it is often related to cancerous malignancies since EMT is frequently observed in  
16 cancer cells and can facilitate metastatic dissemination (Jia et al., 2016; Morandi et al., 2017;  
17 Ocaña et al., 2012). Therefore, identifying new aspects of the EMT program is crucial for future  
18 therapeutic developments.

19 Here, we demonstrate that OSBP at ER-Golgi contact sites regulates the secretion of a set of  
20 cargo proteins in epithelial cells, such as cell junction proteins including E-cadherin, thereby  
21 contributing to the maintenance of epithelial polarity. Moreover, OSBP-dependent cadherin  
22 trafficking relies on the cholesterol-transfer activity of OSBP. Importantly, when cells  
23 downregulate cell-cell junctions during EMT, OSBP-mediated lipid transfer in the ER-TGN  
24 contact sites is also reduced, demonstrating the plasticity of the OSBP-regulated secretory  
25 pathway upon this phenotypic switch.

## 1 **Results**

### 2 **1. Epithelial phenotype is associated with high OSBP expression**

3 Epithelial cells are typically polarized along an apico-basal axis and need to organize their  
4 secretory routes to direct cargo molecules according to this geometry. To test whether  
5 members of the ORP family contribute to this function, we first performed a bioinformatics  
6 screen to examine whether the expression of OSBP and the other members of the ORP family  
7 varies across cell lines with different epithelial characteristics (Rajapakse et al., 2018). To this  
8 aim, we extracted the gene expression data of the cell lines included in the Cancer Cell Line  
9 Encyclopedia (Barretina et al., 2012) focusing on all ORP genes as well as a panel of epithelial  
10 and mesenchymal marker genes (**Fig 1A**). To define a cell-line specific epithelial-  
11 mesenchymal signature, we calculated a single epithelial-mesenchymal index (EMI) for each  
12 cell line using the marker gene expression data (**Fig 1B**) and we correlated these values with  
13 the expression levels of the various ORPs (**Fig EV1A, Fig 1C**). This analysis indicates that  
14 OSBPL2 and OSBP expression levels correlate positively with EMI, while OSBPL8 and  
15 OSBPL6 expressions show a negative correlation. Thus, OSBPL2 and OSBP are highly  
16 expressed in cell lines with epithelial characteristics, while OSBPL8 and OSBPL6 are rather  
17 mesenchymal cell-specific genes.

18 To test whether this observation can be extended to disease conditions as well, we repeated  
19 the analysis using RNAseq data obtained from TCGA lung adenocarcinoma specimens (**Fig**  
20 **EV1B-E**). In agreement with the cell-line collection data, we found that OSBP expression  
21 positively correlates with the epithelial feature of the given cancer tissue specimens. EMT can  
22 lead to metastatic dissemination, therefore tumours with mesenchymal characteristics are  
23 often coupled to a shorter patient survival. By analysing lung adenocarcinoma survival data,  
24 we found that high OSBP and OSBPL2 expressions are associated to significantly longer  
25 patient survivals further suggesting that downregulation of these genes is a signature of tumour  
26 malignancy (**Fig 1D**).

27 To experimentally test the re-distribution of ORP gene expression pattern upon EMT, we  
28 triggered EMT in A549 lung adenocarcinoma cells. Although this cell line shows both epithelial  
29 and mesenchymal characteristics, its mesenchymal phenotype can be further enhanced by  
30 TGFbeta treatment (Hajek et al., 2012; Hao et al., 2019; Hua et al., 2019). We assessed the  
31 relative expression of EMT transcription factors and the top-changed ORP mRNA levels by  
32 RT-qPCR. While *snai1* and *snai2*-inductions dominated the TGFbeta-triggered EMT in A549  
33 cells, we observed a concomitant decrease in OSBP and OSBPL2. A significant increase in  
34 OSBPL6 messengers was measured, validating our previous findings, whereas no change in  
35 OSBPL8 expression was observed (**Fig 1E**).

36 To further investigate the epithelial expression of OSBP and OSBPL2, we meta-analysed  
37 histology samples of the Human Protein Atlas (Uhlen et al., 2015). As revealed by specific

Kovács et al. 2021

1 antibodies, OSBP and OSBPL2 proteins exclusively decorate the epithelial cell layers of  
2 various tissue samples such as nasopharynx and urinary bladder, while the skeletal muscle,  
3 which has a mesenchymal origin, lacks OSBP and expresses high levels of OSBPL6 (**Fig**  
4 **EV1F**).

5 We concluded that among all ORP genes, OSBP and OSBPL2 are prominent epithelial  
6 proteins, showing high expression in cell lines with epithelial features and down-regulation in  
7 response to TGFbeta. In the following experiments, we focused on OSBP since its lipid transfer  
8 activity is well-characterized in cells and can be targeted by specific drugs, allowing us to  
9 precisely dissect its potential involvement in epithelial secretion regulation.

10

## 11 **2. OSBP inhibition disrupts epithelial polarity**

12 To test whether silencing of OSBP expression or its targeting with pharmacological inhibitors  
13 affect cell polarity establishment and maintenance, we used MDCK cells, which are able to  
14 form cysts with polarized cells when cultured in extracellular matrix (Mangoo-Karim et al.,  
15 1989; Qin et al., 2010). MDCK cells were nucleofected with siRNA targeting OSBP, then  
16 embedded into Matrigel 24 h later and left to establish cysts with polarized cells for 3 days.  
17 Efficient OSBP silencing was confirmed in cells lysed 4-days after nucleofection (**Fig 2B**). The  
18 developed cysts showed a typical morphology where the apical surface of the cells is oriented  
19 toward a single central open lumen. The tight junction marker ZO-1 decorated the intersection  
20 of the apical and lateral plasma membrane surfaces, E-cadherin was found in the basolateral  
21 domain, and Gp135 localised exclusively on the apical surface of the cells (**Fig 2A**). While only  
22 ~35% of the cysts showed irregular morphology in the control siRNA-nucleofected cells, ~50%  
23 of the OSBP silenced cyst population showed luminal morphology defects (**Fig 2A-C**).  
24 Typically, these cysts developed multiple lumens and displayed apical multipolarity where one  
25 cell formed several apical surfaces.

26 To test the effect of OSBP inhibition on polarized cells, we next used SWG, a drug belonging  
27 to the ORPphilin family and that it is very specific for OSBP (Burgett et al., 2011; Péresse et  
28 al., 2020). Strikingly, overnight treatment of polarized MDCK cysts with the OSBP-targeting  
29 drug SWG leads to a complete loss of cell polarity, as the lumens disappeared and the cysts  
30 acquired a grape-like morphology consisting of round-shaped cells showing no asymmetrical  
31 marker distribution (**Fig 2D**). Although no apical and basolateral membrane domains could be  
32 distinguished in SWG-treated cysts, ZO-1 and Beta-catenin-positive membrane segments  
33 showed no overlap, suggesting that these domains were able to partially preserve their identity  
34 upon OSBP blockage. Interestingly, in SWG-treated cysts, a reduced Beta-catenin and E-  
35 cadherin signal was detected at cell-cell junctions. Additionally, Gp135 was detected in plasma  
36 membrane domains facing towards the extracellular matrix as well (**Fig 2D**). Altogether, the

Kovács et al. 2021

1 gene silencing and pharmacological approaches indicated that a functional OSBP is essential  
2 for the establishment as well as for the maintenance of the epithelial polarity.

3  
4 **3. OSBP proximity landscape reveals epithelial polarity determinants close to ER-TGN**  
5 **contact sites**

6 OSBP might contribute to epithelial polarity maintenance by regulating post-Golgi transport  
7 pathways through lipid transfer between ER and TGN membranes. To test this hypothesis, we  
8 decided to identify secretory cargoes that are localised in the physical proximity of OSBP. We  
9 chose a proximity biotinylation strategy in which the promiscuous biotin ligase TurboID was  
10 fused to the C-terminus of OSBP (**Fig EV 2A**). When expressed in cells, TurboID biotinylates  
11 proteins that are within a 20 nm radius of the fusion protein (Branon et al., 2018). The  
12 biotinylated proximity partners are then purified and identified by mass spectrometry.

13 In MDCK cells stably expressing OSBP-TurboID, the fusion bait was detected both in the  
14 cytoplasm as well as bound to TGN-marker bGalT1 positive Golgi structures (**Fig 3A**).  
15 Accordingly, biotinylated proteins revealed by fluorescently-labelled streptavidin were detected  
16 in the cytoplasm as well as in the Golgi of OSBP-TurboID expressing MDCK cells. Next, we  
17 treated the cells with OSBP inhibitors SWG and OSW-1 for 60 min prior to biotinylation to  
18 increase the partitioning of OSBP to ER-TGN contact sites at the expense of the cytosolic pool  
19 (Burgett et al., 2011; Mesmin et al., 2017; Péresse et al., 2020). Under these conditions, we  
20 observed a drop in the cytoplasmic streptavidin signal and a concomitant increase in the TGN-  
21 localised OSBP pool. Thus, the OSBP-TurboID bait protein behaved as its endogenous  
22 counterpart (**Fig 3A-B**). In addition, ORPphilin treatments promoted the apparition of OSBP-  
23 TurboID on round-shaped cytoplasmic structures, confirming that a pool of OSBP can be  
24 recruited to endo-lysosomal surfaces as well (Lim et al., 2019).

25 For proteomic analysis, we exposed MDCK cells stably expressing OSBP-TurboID to either  
26 DMSO or SWG for 60 min followed by biotin addition during the last 10 min of treatment (**Fig**  
27 **EV2B**). We verified successful protein biotinylation and purification by streptavidin-HRP  
28 blotting and silver staining of the elution fractions, respectively (**Fig EV2C-D**). Following on-  
29 bead trypsinization, peptides were subjected to mass spectrometry and proteins were  
30 identified by subsequent proteomics analyses. Overall, we identified 2641 proteins by this  
31 strategy, among which 200 were considered as background since these hits were also  
32 identified on beads subjected to lysates from biotin-treated MDCK cells not expressing OSBP-  
33 TurboID (**Fig EV2B**). As the nascent TurboID polypeptide can already catalyse protein  
34 biotinylation, proteins classified by the Gene ontology (GO) group as “Ribonucleoprotein  
35 Complex” were also considered as false positive hits and excluded from further analysis (**Fig**  
36 **3C**).

Kovács et al. 2021

1 In the DMSO-treated cells, we identified many proteins already known to interact or co-localise  
2 with OSBP at MCS. These include the VAP isoforms (VAPA and VAPB), the PI(4)P generating  
3 kinase PI4KIIIbeta (PI4KB) and the ER-resident phosphatase SAC1 (SACM1L). Additionally,  
4 we detected the ceramide transporter CERT1 and the glucosylceramide-transfer protein  
5 FAPP2 (PLEKHA8), confirming their collaboration with OSBP at the ER-TGN contact sites (**Fig**  
6 **3D**).

7 Next, we wanted to identify potential secretory cargoes among the identified hits. Since Golgi  
8 secretion directs cargoes to the extracellular space, to the endo-lysosomal system or toward  
9 the plasma membrane, we classified the hits according to their final cellular localization. We  
10 identified 37 proteins listed in the GO group “extracellular space”, 69 categorized as  
11 “endosome”, and 586 classified as “plasma membrane” (**Fig 3E**), suggesting that the majority  
12 of the OSBP-proximity cargoes are proteins directed toward the plasma membrane.  
13 Furthermore, we found a large overlap between previously published MDCK surface proteome  
14 (Caceres et al., 2019) and the OSBP proximity proteome, suggesting that a considerable  
15 portion of the surface proteins are getting close to OSBP upon their secretion (**Fig EV2E**).  
16 However, when we correlated the abundance of identified proximity partners in the DMSO-  
17 treated cells with the apico-basal localization of the MDCK surface proteins, we established no  
18 correlation, indicating that OSBP has no preference toward apical or basolateral cargoes (**Fig**  
19 **EV2F**).

20 To further characterize the proteins of the OSBP proximity landscape, we performed a  
21 statistical analysis using Metascape (Zhou et al., 2019), which allowed us to assess significant  
22 enrichments in cellular components, molecular function and biological processes-related GO  
23 terms. As expected, statistically significant enrichments were found in multiple GO groups  
24 encompassing ER and Golgi-resident proteins. Importantly, other GO terms such as “cell-  
25 substrate junction” and “cell-cell junctions” showed significant enrichments as well (**Fig 3F**).  
26 Strikingly, “cadherin binding” and “establishment or maintenance of cell polarity” GO groups  
27 were found amongst the top significantly enriched groups upon classification by molecular  
28 function and biological processes (**Fig EV2G-H, Source Data 1**). Besides the numerous  
29 adherent junction components (e.g. cadherins and catenins), we identified tight junction  
30 proteins (e.g. TJP1 and 2, Occludin, MarvelD2 and Claudin), integrins, CD44, EpCam and the  
31 apical marker proteins PODXL and MUC1, all of which are regulators or determinants of  
32 epithelial polarity, suggesting that OSBP contributes to epithelial polarity by regulating these  
33 factors.

34 Because SWG-treatment stabilizes OSBP at contact sites, cargoes close to ER-TGN contact  
35 sites should show an increased abundance among the hits when cells are treated with this  
36 drug. Thus, we divided the hits into three groups according to their fold change upon SWG  
37 treatment: hits that showed no significant change, hits with increased and hits with decreased

Kovács et al. 2021

1 abundance across the OSBP proximity proteome upon treatment (**Fig 3G**). Then, we mapped  
2 specific classes of hits to the volcano plot to show their SWG-dependent distribution in the  
3 OSBP proximity landscape. Hits classified as ER and Golgi-resident factors were enriched with  
4 the highest extent among proteins that showed an increased abundance around OSBP after  
5 SWG treatment (**Fig 3H-J**). On the contrary, most cytosolic hits showed a decreased  
6 abundance in the vicinity of OSBP when cells were treated with SWG (**Fig 3H, K**). Next, we  
7 mapped proteins that are classified as “intrinsic components of the plasma membrane” and,  
8 thereby, potential secretory clients of OSBP. The majority of these proteins showed an  
9 increased abundance upon SWG-treatment in the OSBP proximity proteome (**Fig 3H, L**).  
10 Since the enrichment analyses indicated the presence of many cell junction components  
11 among the identified partners, we wanted to see whether their abundance in the OSBP  
12 proximity proteome changes upon SWG-treatment as well. For this, we selected those hits that  
13 are classified as cell “junction proteins” or “cell adhesion molecules” and we found that the  
14 majority of these proteins enriched around OSBP upon SWG-treatment (**Fig 3H, M**). Thus, a  
15 high number of cell surface proteins and cell junction molecules become more abundant in the  
16 proximity of OSBP when it is forced to accumulate at ER-Golgi contact sites by SWG-  
17 treatment, indicating that these proteins become close to OSBP when they are sorted in the  
18 Golgi membranes along their secretion.

19

#### 20 **4. OSBP controls E-cadherin trafficking and cell surface expression**

21 Together with numerous cell junction components (**Source Data 1**), E-cadherin was identified  
22 in the OSBP proximity, suggesting that OSBP contributes to its trafficking. E-cadherin  
23 expression on the cell surface is one of the major hallmarks of epithelial organization, and its  
24 loss is frequently observed in carcinoma demonstrating that it functions as a potent tumour  
25 suppressor (Dongre & Weinberg, 2019; Thiery, 2002). Thus, we decided to use E-cadherin to  
26 validate the functional interaction between OSBP and one of its identified proximity partners.  
27 Immunoblot analysis of whole cell lysates and pull-down of biotinylated proteins obtained from  
28 OSBP-TurboID-expressing MDCK cells showed that only a minor portion of the total E-  
29 cadherin pool got biotinylated over the 10 min-biotin treatment, suggesting transient interaction  
30 between OSBP and E-cadherin (**Fig EV3A**). Remarkably, incubating the cells for 2 h in biotin-  
31 free medium after a 10 min biotin exposure led to the appearance of the biotinylation signal at  
32 the cell-cell junctions, whereas no cell-boundary-specific signal was observed when the cells  
33 were fixed directly after the 10 min-biotin treatment (**Fig 4A**). Hence, we hypothesised that  
34 neosynthesized E-cadherin gets into the proximity of OSBP along its sorting in the *trans*-Golgi  
35 network.

36 To directly assess whether E-cadherin trafficking depends on OSBP, we applied the retention  
37 using selective hooks (RUSH)-system using EGFP-tagged E-cadherin as a model cargo



Kovács et al. 2021

1 (Boncompain et al., 2012). This method consists of trapping a chosen cargo by streptavidin-  
2 dependent interaction with ectopically co-expressed ER-resident KDEL, and in promoting a  
3 wave of cargo secretion by adding biotin to compete out the E-cadherin/KDEL interaction. With  
4 this system, we observed that E-cadherin was released from the ER and transported to the  
5 Golgi within 60 min after biotin addition (**Fig 4B, C**). Thereafter, E-cadherin left the Golgi and  
6 appeared at the cell-cell junctions in ca. 120 min (**Fig 4B** arrowheads, **Movie EV1**). When  
7 biotin was co-administrated with OSBP inhibitor OSW-1 or SWG, the kinetics of ER to Golgi  
8 transport of E-cadherin was comparable to that of the control. In contrast, the exit of E-cadherin  
9 from the Golgi apparatus was significantly delayed upon both OSW-1 and SWG treatments,  
10 resulting in higher E-cadherin signal at the Golgi (**Fig 4B, C, Movie EV1**). Thus, OSBP function  
11 is essential for complete E-cadherin secretion.

12 To test whether OSBP blockage affects the secretion of endogenous E-cadherin as well, we  
13 treated TGN-marker bGalT1-BFP-expressing MDCK cells with OSW-1 or SWG and fixed the  
14 cells 4 h after treatment to immunolabel endogenous E-cadherin (**Fig 4D**). As expected, E-  
15 cadherin in the control samples decorated mostly the cell-cell junctions, whereas it  
16 disappeared from the cell-cell junctions in the treated samples and accumulated in the *trans*-  
17 Golgi network (**Fig 4D, F**). Importantly, we observed the same trend when we investigated  
18 beta-catenin – another cargo identified in the proximity biotinylation screen – highlighting that  
19 other, non-transmembrane components of adherent junctions follow the same OSBP-  
20 dependent trafficking route (**Fig 4E, G**).

21 To further test the role of OSBP on adherent junction regulation, we grew EGFP-expressing  
22 MDCK cells to form colonies and performed overnight time-lapse imaging after the addition of  
23 the OSBP-inhibiting drugs OSW-1 and SWG (**Fig 4H-I, Movie EV2**). In the DMSO-treated  
24 control, we observed only basal expansion of the colonies due to cell proliferation. However,  
25 after 8 hours exposure to ORPphilins, the colonies started to scatter, indicating that OSBP-  
26 inhibition has a striking impact on cell-cell junction dynamics.

27 To test whether secretion of other cargo types also show dependency on OSBP, we applied  
28 the RUSH system in cells co-expressing mCherry-tagged E-cadherin cargo with small soluble,  
29 lumenally retained EGFP (ssEGFP). Following biotin-induced release, both model cargoes  
30 entered the Golgi network and followed similar secretory kinetics (**Fig 4J-K**). Co-administrating  
31 OSW-1 with biotin, however, triggered only a minor shift in soluble EGFP-secretion, while this  
32 treatment affected mCherry-E-cadherin secretion with a higher degree (**Fig 4K, Movie EV3**).  
33 In line with previous observations on other model cargoes (Boncompain et al., 2012), confocal  
34 microscopy showed that E-cadherin and ssEGFP diverge in their trafficking as non-overlapping  
35 EGFP and mCherry-E-cadherin regions were observed 60 and 120 min following biotin  
36 administration (**Fig EV3B**). This experiment shows that OSBP inhibition selectively affects the  
37 trafficking of distinct cargoes.

Kovács et al. 2021

1  
2  
3  
4  
5  
6  
7  
8  
9  
10  
11  
12  
13  
14  
15  
16  
17  
18  
19  
20  
21  
22  
23  
24  
25  
26  
27  
28  
29  
30  
31  
32  
33  
34  
35  
36  
37

## **5. OSBP-driven cholesterol is necessary for epithelial polarity and cargo secretion**

Because OSBP loads TGN membranes with cholesterol, we hypothesised that the previously observed effects of OSBP inhibition on cargo trafficking is due to drop of cholesterol level along the secretory membranes. To test this, we first investigated the effect of OSBP silencing on the distribution of cholesterol in 3D polarized MDCK cells. As expected, the probe D4H-GFP, which recognizes accessible cholesterol in membranes (Das et al., 2014; Maekawa, 2017; Takahashi et al., 2021), decorated cell membranes of the polarized cells and an enrichment of the fluorescent signal was detected at the basolateral domain of the plasma membrane of the control siRNA-transfected cells (**Fig 5A**). Upon OSBP silencing, those cysts which exhibited morphological defects (**Fig 2A**) also showed altered cholesterol distribution. In such cells, the signal of the D4H-cholesterol probe decreased at the plasma membrane and appeared in small, cytoplasmic structures (**Fig 5A**). We found a similar phenotype when we treated MDCK cysts overnight with SWG; however, the drug treatment exhibited a stronger effect as compared to OSBP silencing (**Fig 5B**). Thus, OSBP regulates cholesterol levels of the post-Golgi membranes in polarized epithelial cells.

To investigate the importance of cholesterol in OSBP-dependent secretion, we followed the OSBP-dependent cargo E-cadherin using the RUSH system in MDCK cells subjected to cholesterol depletion. We found that cholesterol depletion did not affect ER-to-Golgi transition of E-cadherin. However, the Golgi exit of the E-cadherin cargo was blocked in cholesterol depleted cells (**Fig 5C-D, Movie EV4**). Moreover, cholesterol depletion led to scattering of MDCK colonies, further demonstrating the essential function of cholesterol in the secretion of this OSBP-dependent cargo (**Fig 4E, F, Movie EV5**). We concluded that OSBP regulates polarity maintenance and E-cadherin secretion by providing cholesterol to post-Golgi membranes.

## **6. TGFbeta-induced EMT alters cholesterol homeostasis**

We found that OSBP is expressed with high level in epithelial cells, while its expression is lower in mesenchymal cells. Since OSBP transfers cholesterol, downregulation of its expression suggests a change in cholesterol homeostasis during EMT, which might contribute to the loss of epithelial characteristics including E-cadherin surface expression. Moreover, epithelial and mesenchymal cells possess different characteristics of cell junction and cell polarity regulation, whose determinants are typically OSBP-dependent secretory cargoes. Therefore, we decided to compare the regulation of the OSBP-dependent cargo secretion in these two cell types.

First, we characterized the changes in sterol homeostasis during TGFbeta-induced mesenchymal progression in the lung adenocarcinoma A549 cells. RT-qPCR data show that

Kovács et al. 2021

1 genes involved in transcriptional regulation of sterol homeostasis, cholesterol biosynthesis and  
2 uptake and efflux, had a decreased expression in TGFbeta-induced mesenchymal cells  
3 compared to control cells (**Fig 6A**). Because cholesterol has a preference towards membranes  
4 containing saturated lipids, we characterized the acyl-profiles and the relative amounts of  
5 phospholipid species as well as ceramides and sphingomyelins in control and TGFbeta-treated  
6 cells using mass spectrometry. We calculated a saturation value by dividing the total number  
7 of double bonds in the acyl chains by the acyl chain length (number of carbons) and we labelled  
8 each lipid species on a blue-red colour gradient, accordingly. Strikingly, the relative quantity of  
9 lipids with high unsaturation values (red) increased upon EMT, while the relative level of those  
10 characterized by high saturation (blue) showed a decreasing tendency (**Fig 6B, Source Data**  
11 **2**), indicating that several membrane lipids switch toward unsaturation upon mesenchymal  
12 progression.

13 To test whether this change in acyl profiles was accompanied by a reduction in cholesterol  
14 level as well, we performed high-performance thin layer chromatography (HP-TLC) using a  
15 cholesterol standard curve to quantify cholesterol in control and TGFbeta-stimulated A549  
16 cells (**Fig EV4A**). As expected, TGFbeta reduced total cholesterol level; TGFbeta-triggered  
17 cells contained approximately 14% less cholesterol than the control cells (**Fig 6C**). Changes  
18 in other lipid classes such as triglycerides and cholesteryl-esters were also observed, further  
19 demonstrating the complex alterations in lipid homeostasis upon EMT (**Fig EV4A-B**).

20 Finally, we applied the recently developed pyrene-derivative (PA) probe to assess membrane  
21 lipid order in living control and TGFbeta-stimulated cells (Niko et al., 2016). As previously  
22 reported, cellular membranes show a gradient in the obtained pixel ratio values (Niko et al.,  
23 2016). Endomembranes such as Golgi appeared as more polar (red) than the plasma  
24 membrane (blue), due to the enrichment of saturated lipids and cholesterol in the PM.  
25 Interestingly, PA emission ratio reached the lowest values at cell-cell junctions indicating that  
26 these structures favour highly ordered membranes (**Fig 6D**). Strikingly, TGFbeta induced a  
27 massive shift in the ratio values toward the red part of the spectrum, indicating that these cells  
28 became enriched in disordered membranes, most probably because of lower cholesterol levels  
29 and elevated unsaturation (**Fig 6D**).

30 As an alternative to TGFbeta addition, we scratched an A549 cell layer to promote a  
31 spontaneous EMT where cells close to the wound edge migrate toward the cell-free zone.  
32 Comparing migrating and non-migrating A549 cells by PA ratiometric imaging showed a  
33 comparable phenotype to that observed upon TGFbeta stimulation: migrating cells contain less  
34 ordered membranes than their non-migrating counterparts (**Fig 6E**). We concluded that EMT  
35 is accompanied by profound changes in bulk lipid homeostasis including cholesterol, which  
36 might reflect a decrease in OSBP function and contribute to the loss of epithelial phenotype.

37

## 1 **7. OSBP-function is downregulated upon EMT**

2 Since cholesterol homeostasis is changed upon TGFbeta treatment, we assessed whether  
3 OSBP activity was down-regulated as well during EMT. We started by investigating OSBP  
4 expression levels at different stages of EMT. In good agreement with our previous  
5 bioinformatics screen and with our RT-qPCR data (**Fig 1**), OSBP protein expression showed  
6 a minor time-dependent decrease upon TGFbeta-treatment (**Fig EV5A-B**). We depleted OSBP  
7 in A549 cells by siRNA to determine whether OSBP levels affected the expression levels of  
8 EMT markers. Despite very efficient OSBP depletion, we observed no changes in EMT marker  
9 expression (**Fig EV5C**). Alternatively, we treated cells for 24 h with ORPphilins. Both SWG  
10 and OSW-1 treatments lead to the apparition of bands corresponding to proto-E-cadherin,  
11 indicating the arrest of its secretion in the TGN (**Fig EV5D**). We found that TGFbeta was able  
12 to trigger changes in EMT marker expression upon OSBP silencing, and that TGFbeta-treated  
13 A549 cells were able to recover E-cadherin expression after washing out TGFbeta (**Fig EV5E-**  
14 **F**). Thus, OSBP expression itself does not affect the genetic program of EMT, but its inhibition  
15 affects the surface targeting of the epithelial determinant E-cadherin.

16 To achieve efficient lipid transfer, OSBP constantly cycles between the cytosol and Golgi  
17 membranes, thus when it is highly active, it shows a lower Golgi recruitment in fixed cells. In  
18 contrast, less cycling between its membrane bound and cytosolic form is coupled to a lower  
19 lipid transfer activity, which leads to higher TGN-recruitment of OSBP due to the elevated level  
20 of PI(4)P in the Golgi membranes (Mesmin et al., 2013). In untreated A549 cells, OSBP was  
21 detected both in the cytoplasm and in the *trans*-Golgi network labelled by anti-TGN46. In  
22 TGFbeta-induced mesenchymal cells, OSBP accumulated in the *trans*-Golgi at the expense  
23 of its cytoplasmic pool (**Fig 7A-B**). We observed a similar trend in MDCK cells upon treatment  
24 with HGF, which is a more potent EMT-inducer than TGFbeta in this cell line (**Fig EV5G, H**)  
25 (Howard et al., 2011).

26 To examine whether this redistribution of OSBP could be observed when epithelial cells  
27 undergo EMT spontaneously, we cultured cells until they reached confluency, followed by  
28 scratching the cell layer to obtain a cell-free area. In the following 24 hours, cells in the  
29 proximity of the wound edge migrated into the cell-free zone and underwent spontaneous EMT,  
30 while the remaining cells preserved their epithelial features. The immunofluorescent signal  
31 corresponding to endogenous OSBP showed a gradual *trans*-Golgi enrichment in the cells  
32 closer to the wound edge (**Fig 7C-D**), confirming a correlation between EMT and a shift in the  
33 partitioning of OSBP between the cytosol and ER-*trans* Golgi membrane contact sites. The  
34 consistent shift of OSBP towards the TGN upon various EMT-triggering approaches suggests  
35 downregulation of its lipid transfer activity.

36 Since OSBP is recruited to the contact sites via its PI(4)P-binding PH-domain, an elevated  
37 Golgi PI(4)P level could explain its increased recruitment to the Golgi membranes in

Kovács et al. 2021

1 mesenchymal cells. In agreement with this, it has been suggested that mesenchymal cells  
2 have higher PI(4)P levels compared to epithelial cells (Tokuda et al., 2014). To measure the  
3 level of PI(4)P at the Golgi, we ectopically expressed the PI(4)P reporter GFP-P4M-SidM in  
4 control and in TGFbeta-treated A549 cells, followed by labelling the *trans*-Golgi Network with  
5 a TGN46-specific antibody (**Fig 7E**). Quantification of the confocal micrographs shows that the  
6 level of PI(4)P at the Golgi increased in TGFbeta-triggered mesenchymal cells (**Fig 7F**). A  
7 similar phenotype was observed when we compared the localization of a GFP-fused form of  
8 the PI(4)P binding PH-domain of OSBP (GFP-PH-OSBP) in epithelial and mesenchymal cells  
9 confirming that the increase in OSBP at the TGN is due to elevated PI(4)P binding (**Fig 7G-**  
10 **H**).

11 We previously reported that about half of the total cellular PI(4)P pool is consumed by OSBP  
12 (Mesmin et al., 2017). Therefore, an elevated Golgi PI(4)P level might reflect that OSBP is  
13 biochemically less active in the contact sites. To determine whether the difference in PI(4)P  
14 levels between epithelial and mesenchymal cells was due to differences in the biochemical  
15 activity of OSBP, we measured the increase in PI(4)P at the TGN upon OSW-1 addition. By  
16 inhibiting OSBP, this drug protects PI(4)P from the OSBP lipid exchange cycle; thus,  
17 comparing steady-state and maximal values allows the estimation of the pool of PI(4)P that is  
18 consumed by OSBP. Following OSW-1 addition, Golgi-specific PI(4)P levels increased rapidly  
19 and then reached a plateau within 15 min in both epithelial and mesenchymal cells (**Fig 7I-K**).  
20 However, the difference between the steady state and the maximal value was bigger in  
21 epithelial cells than in mesenchymal cells (**Fig 7K**). Quantification of the PI(4)P signal before  
22 and after OSW-1 addition suggested that OSBP consumed ca. 70% of the total cellular PI(4)P  
23 pool in control A549 cells compared to only ~40% in TGFbeta-treated cells, indicating a  
24 significant reduction of OSBP activity between control and TGFbeta-stimulated cells (**Fig 7K**).  
25 Performing a similar experiment on HGF-stimulated MDCK cells stably expressing the GFP-  
26 P4M-SidM sensor led to similar results (**Fig EV5I-J**). Altogether, these results indicate that  
27 OSBP is biochemically less active in TGFbeta-triggered mesenchymal cells, and that the  
28 excess of Golgi-localised PI(4)P in such cells results in the elevated recruitment of OSBP to  
29 the contact sites (**Figure 7L**).

30 Considering the importance of OSBP in the traffic of E-cadherin and the diminished OSBP  
31 activity upon mesenchymal progression, we finally asked whether forced secretion of this  
32 OSBP-dependent cargo in TGFbeta-stimulated cells followed the same kinetics and trafficking  
33 efficiency as in their non-stimulated counterparts. For this, we expressed GFP-tagged E-  
34 cadherin as a RUSH cargo in control and in TGFbeta-induced mesenchymal cells. Live cell  
35 imaging experiments showed that mesenchymal cells accumulated much more E-cadherin in  
36 the Golgi due to delayed exit of E-cadherin from Golgi-structures as compared to control cells  
37 (**Fig 7M-N, Movie EV6**). Altogether, these experiments suggest that upon EMT, cells

Kovács et al. 2021

- 1 downregulate not only the expression of the epithelial proteins but also reduce OSBP-
- 2 dependent lipid exchange, which assures the subcellular distribution of epithelial determinants
- 3 such as E-cadherin.

Kovács et al. 2021

## 1 **Discussion**

2 Among the members of the ORP protein family, we identified OSBP as a prominent epithelial  
3 cell-specific gene. Moreover, we found that OSBP inhibition by the specific drug SWG lead to  
4 the loss of epithelial polarity, demonstrating a key function of OSBP in maintaining the epithelial  
5 phenotype. In addition, cysts developed from OSBP-silenced cells also displayed higher  
6 percentage of morphological defects than their controls. Because OSBP transfers cholesterol  
7 and PI(4)P at ER-TGN contact sites, we hypothesised that by regulating Golgi lipid  
8 environment, OSBP controls cargo-specific secretion to regulate epithelial polarity.

9 By exploiting a TurboID-based proximity ligation, we detected numerous plasma membrane-  
10 localised proteins and their cytoplasmic associated partners in the vicinity of OSBP. The  
11 repertoire of OSBP partners includes many components of cell junction complexes such as  
12 adherent junctions, tight junctions, desmosomes, focal adhesions and gap junctions, which are  
13 key determinants of epithelial polarity. Upon OSBP inhibition, the majority of the cell junction  
14 and adhesion molecules become enriched in the OSBP proximity proteome. Since this  
15 condition also enriches OSBP at the ER-TGN contact sites, we suggest that these cargoes go  
16 to the proximity of such contact sites when they are subjected to Golgi secretion.

17 By combining live cell imaging and synchronized cargo release from the ER, we discovered  
18 that the secretion of one of the identified OSBP proximity proteins, E-cadherin, is arrested in  
19 the Golgi upon OSBP inhibition, showing that OSBP activity is necessary for post-Golgi E-  
20 cadherin secretion and surface expression. We found that, similarly to E-cadherin,  
21 endogenous beta-catenin distribution is also affected by OSBP inhibition, indicating that non-  
22 transmembrane components of the adherent junctions also depend on OSBP for their  
23 trafficking. Because adherent junction complexes are assembled at least partially during Golgi  
24 maturation, it is not surprising that they move together along the late secretory pathway,  
25 thereby being affected *en bloc* by OSBP inhibition (Chen et al., 1999; Curtis et al., 2008; Wahl  
26 et al., 2003).

27 Importantly, depleting cholesterol from the membranes phenocopied the effects of ORPphinin  
28 treatments on E-cadherin secretion, indicating that OSBP-provided cholesterol is the key  
29 molecule of OSBP-regulated secretion. Because cadherin molecules are embedded in  
30 cholesterol-rich plasma membrane regions (Guillaume et al., 2013; Resnik et al., 2019; Seveau  
31 et al., 2004), we propose that this membrane environment is assembled upon Golgi sorting by  
32 the contribution of OSBP-mediated cholesterol transfer and is a pre-requisite for efficient *trans*-  
33 Golgi trafficking of E-cadherin. Notably, a class of TGN-derived transport carriers named  
34 CARTS (Carriers of the TGN to the cell surface) have been already identified as cholesterol  
35 dependent transport vesicles (David & Castro, 2021; Wakana et al., 2021). Although the  
36 purification of this vesicle fraction is demanding, early proteomic characterization identified a  
37 high number of desmosomal proteins in such transport vesicles (Wakana et al., 2012). As we

Kovács et al. 2021

1 identified major desmosomal proteins in the OSBP proximity proteome, an overlap between  
2 CARTS cargoes and OSBP-dependent secretory clients is likely. It has long been suggested  
3 that cholesterol-enriched microdomains in the TGN facilitate the apical secretion of some  
4 cargoes (Cao et al., 2012; Keller & Simons, 1997). However, we identified both basolateral  
5 and apical cargoes in the OSBP-proximity ligation assay. Thus, we propose that OSBP-derived  
6 cholesterol facilitates cargo clustering in the TGN membrane to distribute surface proteins of  
7 epithelial cells. How this assembly process, which should require spatio-temporal coordination  
8 between ER-TGN contact sites and the formation of trafficking intermediates at the TGN  
9 precisely occurs, will require further investigation. We note that the contact sites involving  
10 OSBP are highly dynamic (Mesmin et al., 2017) and engage only a fraction of the TGN  
11 membranes, which might favour the formation of transport intermediates in their close  
12 proximity.

13 When cells undergo a phenotypic switch such as differentiation, they must not only change  
14 their overall proteomic profiles, but also re-shape their secretory routes to better support the  
15 trafficking of their actual cargo set. The epithelial-to-mesenchymal transition is an ideal model  
16 to observe such changes for multiple reasons. First, expression of cell-cell junction  
17 components is reduced in mesenchymal cells to prime the individualization of the cells.  
18 Therefore, many of the identified cargoes of the OSBP-regulated secretion are downregulated  
19 in these cells. Second, similar to others, we observed major changes in membrane lipid  
20 composition upon EMT, which is coupled to re-wiring of cholesterol homeostasis (Giudetti et  
21 al., 2019; Sampaio et al., 2011). Since we previously found that OSBP consumes less PI(4)P  
22 when the level of cholesterol to be transported is lower, the altered cholesterol homeostasis  
23 suggests adaptation of the OSBP cycle upon changes in EMT status as well (Mesmin et al.,  
24 2017). Third, our initial meta-screen on RNAseq data shows that OSBP is predominantly  
25 expressed in cells with high epithelial scores, while in mesenchymal cells, its expression is  
26 lower, suggesting that there is a demand for elevated OSBP function in epithelial cells. In  
27 addition to this, cohorts indicate that low OSBP expression is coupled to poor patient survival  
28 in some cancers, which further suggests that high OSBP levels are associated with a more  
29 differentiated – therefore less fatal – cellular phenotype.

30 We found that OSBP burns less PI(4)P in mesenchymal cells than in epithelial cells, indicating  
31 that its lipid transfer activity is downregulated upon EMT. Furthermore, we found that the  
32 mesenchymal Golgi environment is less permissive to process high cholesterol-demanding  
33 model cargoes such as E-cadherin. These findings highlight a new aspect of the EMT program:  
34 a decrease in OSBP activity and OSBP-dependent cargo secretion. To achieve this, the cell  
35 might control OSBP at three levels: (i), downregulate its protein expression, (ii), cut off  
36 cholesterol flux from OSBP, (iii), regulate its activity by posttranslational modifications e.g.  
37 phosphorylation (Goto et al., 2012). Notably, we found that that OSBP protein level is slightly



Kovács et al. 2021

1 decreased upon EMT, and we detected reduction of total cholesterol content upon EMT as  
2 well. Whether these changes are the determining reasons for the 2-fold decrease in OSBP-  
3 dependent PI(4)P consumption upon EMT remains to be elucidated.

4 OSBP silencing by siRNA and OSBP blocking by ORPphilins do not necessarily lead to the  
5 same phenotype. For example, SWG treatment has a massive effect on cholesterol distribution  
6 and cyst morphology, while OSBP silencing triggers similar, but less prominent effects.  
7 ORPphilins stabilizes OSBP at ER-TGN contact sites, thereby freezing its dynamics. In  
8 contrast, silencing OSBP expression reduces its level at the contact sites, which might let other  
9 ORPs compensate for the lack of OSBP function, thus favouring rescue phenotypes, an effect  
10 previously observed for the related Osh family in yeast (Beh et al., 2001). Burgett et al. also  
11 found that silencing of OSBP expression does not precisely phenocopy ORPphilin treatments  
12 on cell proliferation. Whether this is due to the activation of compensatory mechanisms, needs  
13 to be studied. Nevertheless, these differences highlight the importance of having specific  
14 pharmacological tools to study OSBP functions in a spatiotemporal manner in cells.

15 Among the OSBP proximity proteins, we identified a set of cytoplasm-localised factors, which  
16 show a tendency to be enriched in the proximity of the non-membrane bound, soluble form of  
17 OSBP. OSBP has already been reported to function as a cytoplasmic scaffold protein to initiate  
18 the assembly of phosphatase-containing complexes (Wang et al., 2005). In good agreement  
19 with this finding, we identified numerous phosphatases and kinases in the OSBP proximity  
20 landscape, suggesting that the function of OSBP might not be limited to cholesterol transport  
21 but extend to cell signalling.

22 In conclusion, our work contributes to a better understanding of how lipid transfer proteins  
23 regulate secretory mechanisms of specific cargoes. The OSBP-dependent secretory pathway  
24 shows high cell environment-dependent plasticity and is regulated upon EMT. Since EMT is  
25 considered to be a pre-requisite for metastasis and is a hallmark of cancer malignancy,  
26 analysing the OSBP-dependent secretory pathway, should help understanding malignant  
27 secretion and serve to identify new targets for rational therapeutic developments.

Kovács et al. 2021

## 1 **Materials and Methods**

### 2 **Plasmids and reagents**

3 To generate OSBP-TurboID-HA, we amplified OSBP cDNA using sequence specific primers  
4 containing NheI and HindIII cutting sites from an OSBP-mCherry expressing plasmid described  
5 earlier (Mesmin et al., 2013), then the amplicon was inserted into a pcDNA3.1-Zeo(+) vector.  
6 Using specific primers containing HindIII and BamHI restriction sites TurboID was amplified  
7 from a reference template plasmid and the sequence was inserted into this vector to generate  
8 an OSBP-TurboID-HA expressing construct. In order to replace the EGFP-tag with mCherry in  
9 the Str-KDEL\_SBP-EGFP-Ecadherin construct, EGFP was digested from the plasmid using  
10 SbfI and FspI restriction enzymes then the mCherry cDNA amplified by sequence-specific  
11 primers was inserted into the plasmid by blunt ligation. All the generated plasmids were  
12 subjected to capillary sequencing prior to application to confirm that their sequences were  
13 correct. For detailed information on origin, application and reference of plasmids and reagents  
14 used in this study, see **Supplementary Table**.

15

### 16 **Cell culture, EMT, plasmid and siRNA transfection, 3D cyst formation**

17 MDCK cells were cultured in Minimal Essential Medium with Earl's balance salts (EMEM,  
18 Sigma-Aldrich) completed with 5% foetal bovine serum and 1% ZellShield (Minerva Biolabs).  
19 A549 cells were maintained in Dulbecco's Modified Eagle's Medium (DMEM, Gibco)  
20 complemented with 10% FBS and 1% ZellShield. Cells were maintained in a 37°C humidified  
21 incubator kept in a 5% CO<sub>2</sub> atmosphere. To transfect plasmid DNA and siRNA (Thermo Fisher  
22 Scientific), MDCK cells were nucleofected by Amaxa Cell Line Nucleofector using Kit L  
23 (Lonza). Plasmid DNA was transfected into A549 cells by Xfect transfection reagent (Takara  
24 Bio), while transfection of ON-Targetplus siRNAs (Dharmacon) was carried out by  
25 Lipofectamine RNAiMAX Transfection Reagent (Invitrogen) following the instructions of the  
26 manufacturer. siRNA target sequences can be found in **Supplementary Table**. To induce  
27 EMT in A549 cells, 0.25 x 10<sup>6</sup> cells were seeded into 10 mL cell culture dishes then treated  
28 with 5 ng/mL TGFbeta (Abcam) on the next day. TGFbeta was kept on the cells for at least 72  
29 h or for indicated times. Cells were re-seeded to appropriate culture dishes for experiments,  
30 keeping a 5 ng/mL TGFbeta concentration in the medium throughout the experiment. A similar  
31 approach was used for MDCK cells, however, these cells were stimulated with 40 ng/mL HGF  
32 for 24 h. To form MDCK cysts, 2000 trypsin-individualised cells were re-suspended in 20 µL  
33 Matrigel (Corning) and dropped on 8 or 4 well µ-Slide chambered coverslips (Ibidi). Following  
34 the polymerization of the gel, cell culture medium was placed on the samples and cysts were  
35 let to develop for 72 h.

36

### 37 **Generation of stable cell lines**

Kovács et al. 2021

1 To generate stable cell lines, MDCK cells were transfected with linearized plasmid DNA and  
2 selected with either 500  $\mu\text{g}/\text{mL}$  G418 (Sigma-Aldrich) or 400  $\mu\text{g}/\text{mL}$  Zeocin (Gibco) 48 h  
3 following transfection for 2 weeks. Surviving colonies were picked and tested for transgene  
4 expression by immunoblotting or fluorescent microscopy. For the proximity labelling assays,  
5 clones expressing OSBP-TurboID-HA with a similar level to that of the endogenous OSBP  
6 were selected.

7

### 8 **RT-qPCR**

9 To analyse mRNA expression of selected genes,  $0.2 \times 10^6$  A549 cells were seeded to 6 cm  
10 diameter culture dishes, then EMT was induced with 5 ng/mL TGFbeta for 72 h. Total RNA  
11 was purified using RNeasy Plus Mini kit (Qiagen), and a total amount of 2  $\mu\text{g}$  RNA was reverse  
12 transcribed with a GO Script Reverse Transcriptase kit (Promega) using random primers.  
13 Relative transcript levels were measured in a LightCycler<sup>®</sup> 480 Instrument (Roche) using  
14 Takyion<sup>™</sup> No Rox SYBR<sup>®</sup> MasterMix (Eurogentec). Gene-specific primer sequences are  
15 summarized in **Supplementary Table**. To calculate gene expression levels, the  $\Delta\Delta\text{CT}$  method  
16 was applied using GAPDH as a reference gene.

17

### 18 **Immunofluorescence and confocal microscopy**

19 For immunofluorescent labelling, cells were seeded into 8 or 4 well  $\mu$ -Slide chambered  
20 coverslips (Ibidi). Following the experimental procedures, cells were fixed using 4% PFA and  
21 quenched in 50 mM  $\text{NH}_4\text{Cl}$ . Cells were permeabilized with 0.5% Saponin in 2% BSA-PBS then  
22 antibodies were diluted in the same buffer and incubated with the cells overnight at 4°C.  
23 Following three washing steps with PBS, secondary antibodies were applied for 1 h together  
24 with Hoechst (Invitrogen) and other dyes such as DraQ5 (Cell Signaling Technology),  
25 Phalloidin (Invitrogen) and Streptavidin594 (Invitrogen) depending on the experiment.  
26 Detailed list of antibodies and other materials applied for immunolabelling is collected in  
27 **Supplementary Table**.

28 Immunolabelled samples were analysed with a Zeiss LSM 780 confocal microscope operated  
29 with ZEN software using a Plan-Apo- chromat 63X/1.4 Oil objective (Carl Zeiss). CellProfiler<sup>™</sup>  
30 4.1.3 image analyses software (McQuin et al., 2018) was applied to assess confocal  
31 micrographs by custom-made pipelines.

32

### 33 **Epifluorescent live cell imaging and image analysis**

34 For live epifluorescent imaging experiments, nucleofected MDCK cells were seeded into 35  
35 mm diameter  $\mu$ -Dishes (Ibidi) in  $5 \times 10^5$  cell/dish density and incubated 24 h before imaging.  
36 Control or TGFbeta-stimulated A549 cells were seeded at  $0.2 \times 10^6$ . Prior to imaging, cells

Kovács et al. 2021

1 were washed three times with pre-warmed PBS and medium was replaced with 1 mL phenol  
2 red-free culture medium and samples were mounted in a 37°C stage chamber (Okolab). For  
3 RUSH experiments, release of secretory model cargoes was induced by adding biotin to the  
4 cells at 80 µM with DMSO or ORPhilins at the indicated time points. Time-lapse imaging was  
5 carried out by a IX83 inverted microscope (Olympus) equipped with an iXon3 camera (Andor)  
6 and an UPlanSApo 60X/1.35 oil objective (Olympus) and operated by a MetaMorph software  
7 (Molecular Devices). Generated image sequences were analysed by Fiji image processing  
8 software (Schindelin et al., 2012) using StackReg plugin. Data analyses and plotting was  
9 carried out in Rstudio using ggplot2.

### 11 Proximity labelling and proteomics analyses by NanoHPLC-HRMS

12 To map the OSBP proximity interactome,  $1 \times 10^7$  wild type MDCK or MDCK cells stably  
13 expressing OSBP-TurboID were seeded into 150 mm diameter dishes in triplicates/condition.  
14 The next day, cells were either treated with DMSO or with 1 µM SWG. After 50 min, biotin was  
15 added to the culture mediums at 0.5 mM concentration and samples were incubated for an  
16 additional 10 min at 37°C to complete a 1 h SWG treatment time. Cells were then washed 5  
17 times with ice-cold PBS and lysed in RIPA buffer supplemented with cComplete Protease  
18 Inhibitor Cocktail (Roche). Cell lysis was facilitated by sonication and following centrifugation,  
19 protein concentrations were determined from the supernatant using a BCA assay kit (Thermo  
20 Fisher Scientific). Lysates were subjected to immunoblotting to confirm OSBP-TurboID  
21 expression and successful protein biotinylation (**Figure EV2C**). Sample preparation for mass  
22 spectrometry was carried out as described elsewhere (Branon et al., 2018; Hung et al., 2016)  
23 with minor modifications. Briefly, 5 mg of total protein/sample was combined with 330 µL RIPA-  
24 equilibrated Pierce™ Streptavidin Magnetic Beads (Thermo Fisher Scientific) and incubated  
25 on a rotator at 4°C overnight. Beads were washed two times with RIPA buffer, then once with  
26 1 M KCl, 0.1 M Na<sub>2</sub>CO<sub>3</sub>, with 2 M urea diluted in 10 mM TRIS-HCl pH=8.0 and twice with RIPA  
27 buffer again. Approximately 5% of the slurry was saved to verify the successful enrichment of  
28 biotinylated material by silver staining (**Figure EV2D**). Beads were further washed twice with  
29 50 mM Tris-HCl pH=7.5 and twice with 2 M urea diluted in 50 mM Tris-HCl pH=7.5 then on-  
30 bead digestion was performed by adding 0.4 µg Pierce™ MS grade trypsin protease (Thermo  
31 Fisher Scientific) and 1 mM DTT in 2 M urea/50 mM Tris-HCl pH=7.5. Trypsinization was  
32 performed at 25°C with agitation for 1 h, supernatant was removed and beads were washed  
33 two times with 2 M urea/50 mM TRIS-HCl pH=7.5, then the supernatant was combined with  
34 the washes. Peptides were reduced with 4 mM DTT for 30 min at 25°C and alkylated by 10  
35 mM iodoacetamide (Sigma-Aldrich) for 45 min in dark in a thermoshaker. To complete  
36 digestion, 0.5 µg trypsin was added to each sample and digested overnight at 25°C. Following

Kovács et al. 2021

1 this, peptides were desalted on Pierce™ Peptide Desalting Spin Columns (Thermo Fisher  
2 Scientific) and concentrated in a SpeedVac concentrator.  
3 NanoHPLC-HRMS analysis was performed using a nanoRSLC system (ultimate 3000, Thermo  
4 Fisher Scientific) coupled to an Easy Exploris 480 (Thermo Fisher Scientific). Peptide  
5 separation was carried out using the Easy-nLC ultra high performance LC system. 5 µL of  
6 peptide solution was injected and concentrated on a µ-Precolumn Cartridge Acclaim PepMap  
7 100 C18 (i.d. 5 mm, 5 mm, 100 Å, Thermo Fisher Scientific) at a flow rate of 10 mL/min and  
8 using solvent containing H<sub>2</sub>O/ACN/TFA 98%/2%/0.1%. Next peptide separation was  
9 performed on a 75 mm i.d. x 500 mm (2 µm, 100 Å) PepMap RSLC C18 column (Thermo  
10 Fisher Scientific) at a flow rate of 300 nL/min. Solvent systems were: (A) 100% water, 0.1%FA,  
11 (B) 100% acetonitrile, 0.1% FA. The following gradient was used t = 0 min 2% B; t = 3 min  
12 2%B; t = 103 min, 20% B; t = 123 min, 32% B; t = 125 min 90% B; t = 130 min 90% B;  
13 (temperature was regulated at 40°C). MS spectra were acquired at a resolution of 120 000  
14 (200 m/z) in a mass range of 375–1500 m/z with an AGC target 3e6 value of and a maximum  
15 injection time of 25 ms. The 20 most intense precursor ions were selected and isolated with a  
16 window of 2 m/z and fragmented by HCD (Higher energy C-Trap Dissociation) with a  
17 normalised collision energy (NCE) of 30%. MS/MS spectra were acquired in the ion trap with  
18 an AGC target 5e5 value, the resolution was set at 15,000 at 200 m/z combined with an  
19 injection time of 22 ms.

20

## 21 **Mass spectrometry data analyses**

22 MS data were subjected to LFQ analysis using MaxQuant v1.6.17.0  
23 (<http://www.maxquant.org/>) using the MaxQuant platform (v1.6.7.0). Database search of the  
24 MS/MS data was performed in MaxQuant using the Andromeda search engine against *Canis*  
25 *lupus familiaris* UniProtKB database (Nov. 2020) and MaxQuant contaminants database.  
26 Digestion mode was set to Trypsin/ P specificity, with a fixed carbamidomethyl modification of  
27 cysteine, and variable modifications of protein N-terminal acetylation and methionine oxidation.  
28 Mass deviation was set to 20 ppm for the first and 6 ppm for the main search and the maximum  
29 number of missed cleavages was set to 2. Peptide and site false discovery rate (FDR) were  
30 set to 0.01, respectively. The search for co-fragmented peptides in the MS/MS spectra was  
31 enabled (“second peptides” option). Protein identification was performed using a minimum of  
32 2 unique and razor peptides. Quantification was achieved using the LFQ (Label-Free  
33 Quantification) algorithm. Razor and unique peptides were used for LFQ quantification and the  
34 “label min. ratio count” was fixed at 2. The match between runs option was enabled, allowing  
35 a time window of 0.7 min to search for already identified peptides in all obtained  
36 chromatograms. Raw intensity values corresponding each identified proteins were used to  
37 calculate Log<sub>2</sub>Fold change and -Log<sub>10</sub>P values using Welch’s t-test. Identified proteins were

Kovács et al. 2021

1 subjected to enrichment analyses by the online tool [www.metascape.org](http://www.metascape.org) (Zhou et al., 2019)  
2 using selected functional background gene sets with a 0.01 P-value cutoff, while Panther GO  
3 tool ([www.pantherdb.org](http://www.pantherdb.org)) (Thomas, 2003) was used for functional annotation.

#### 4 **Lipidomics analysis**

5 Briefly, a modified Bligh and Dyer (Bligh & Dyer, 1959) extraction was carried out on cell pellets  
6 in order to extract lipids, which were then separated by chromatography with a C18 column  
7 and an appropriate gradient of mobile phase. The mass spectrometry analyses were done  
8 using a Q-Exactive mass spectrometer (Thermo Fisher Scientific) operating in data dependent  
9 MS/MS mode (dd-MS2) and the data were then processed using LipidSearch software v4.2.21  
10 (Thermo Fisher Scientific) in product search mode. Detailed protocol for lipidomics analyses  
11 is included in the supplementary methods.

#### 12 **Immunoblotting**

13  
14 For immunoblotting, whole cell lysates were obtained by lysing the cells in RIPA buffer  
15 containing cOmplete Protease Inhibitor Cocktail (Roche). Following sonication, samples were  
16 pelleted and supernatant was used as whole cell extracts. Protein concentration of each  
17 sample was determined as described before and a total amount of 20 µg protein/sample was  
18 resolved on 4-20% gradient gels (Bio-Rad). Proteins were transferred onto nitrocellulose or  
19 PVDF membranes further blocked with 5% non-fat dry milk-TBST. To reveal biotinylated  
20 proteins, the membranes were probed with HRP-conjugated Streptavidin-HRP diluted in 3%  
21 BSA-TBST. For antibody reactions, samples were transferred to PVDF. Following blocking,  
22 primary antibodies were diluted in 1% non-fat dry milk-TBST and incubated with the  
23 membranes overnight at 4°C. HRP-conjugated secondary antibodies were applied then signal  
24 was developed by a chemiluminescent HRP substrate (Millipore) and detected with a Fusion  
25 FX7 instrument (Vilber Loumat). Antibodies and their respective working dilutions used for  
26 immunoblotting are summarised in **Supplementary Table**.

#### 27 **Scattering assay and image analysis**

28  
29 For cell scattering assays, MDCK-EGFP cells were seeded into 12 well plates at 2000 cell/well  
30 density, then cell clusters were left to grow for 3 days. Following the addition of ORPhilins or  
31 cholesterol depletion, time-lapse imaging was performed in a Cytation5 Cell imaging  
32 multimode-reader set to 37°C, containing 5% CO<sub>2</sub> and operated by a Gen5 software. Cluster  
33 scattering was quantified by measuring object perimeters through the time-laps imaging by  
34 CellProfiler™ 4.1.3 image analyses software.

#### 35 **Pharmacology and cholesterol depletion**

Kovács et al. 2021

1 OSW-1 was a generous gift from Matthew D. Shair (Harvard) while SWG was provided by  
2 Fanny Roussi (CNRS ICSN). For the proximity biotinylation assay, SWG was used at 0.5  $\mu$ M  
3 concentration for 1 h. Upon RUSH experiments, OSW-1 was applied at 20 nM, while SWG  
4 was used at 0.5  $\mu$ M. SWG was used overnight on MDCK cysts at 0.5  $\mu$ M. For experiments  
5 shown Figure 4d, e and h, OSW-1 was applied at 2 nM, while SWG was used at 0.5  $\mu$ M. To  
6 measure OSBP-dependent PI(4)P consumption in living cells, OSW-1 was applied at 50 nM  
7 on GFP-P4M-SidM expressing cells. For cholesterol depletion of MDCK cells, samples were  
8 treated with 5 mM Methyl- $\beta$ -cyclodextrin (Sigma-Aldrich) diluted in 10  $\mu$ M Lovastatin (Sigma-  
9 Aldrich) and 5% lipoprotein-depleted serum-containing medium for two hours, then after 5  
10 washes with PBS, cells were incubated in 10  $\mu$ M Lovastatin and 5% lipoprotein-depleted  
11 serum-containing medium throughout the experiments.

12

### 13 **Lipid order imaging**

14 The lipid order probe PA was a kind gift from Andrey S Klymchenko (CNRS, Illkirch). To  
15 analyse lipid order of living cells, control and TGFbeta-stimulated cells were washed three  
16 times with pre-warmed PBS and PA dye was incubated with the cells for 10 min in phenol red-  
17 free cell culture medium. Following incubation, cells were imaged at 37°C by a Zeiss LSM 780  
18 confocal microscope operated with ZEN software. Samples were excited by 405 nm and  
19 fluorescence in two emission windows (470-550 nm and 550-700 nm) was detected.  
20 Ratiometric images were generated using Fiji software by calculating ratio values between  
21 long and short wavelength channels, then the resulted images were converted to pseudocolor  
22 scale.

23

### 24 **Bioinformatics, data analyses and statistics**

25 For correlation analyses, we extracted EMT marker as well as ORP expression data from  
26 publicly available TCGA data using [www.cbioportal.org](http://www.cbioportal.org) (Cerami et al., 2012). For ORP  
27 expression analyses, a similar approach was used which was described elsewhere (Rajapakse  
28 et al., 2018). For cell line expression data, we used The Cancer Cell Line Encyclopedia set  
29 (Barretina et al., 2012), and a TCGA dataset was used to analyse lung adenocarcinoma patient  
30 data (Hoadley et al., 2018). A previously identified EMT signature gene set was used to define  
31 EMT characteristics (Kohn et al., 2014). To calculate the epithelial-mesenchymal index the  
32 following method was applied: first, mean expression values for epithelial and mesenchymal  
33 markers were obtained ( $Mean_{mes}$  and  $Mean_{epi}$ ), then a cell line/sample-specific EMT value was  
34 calculated by subtracting  $Mean_{epi}$  from  $Mean_{mes}$  and multiplying the value by -1. This formula  
35 was used to calculate a value for all cell lines/tumour samples, then each value was normalised  
36 to the mean EMT value of the total data set. Data visualization and correlation analyses were  
37 carried out using ggplot2 with GGally extension and heatmap.plus package in Rstudio.

Kovács et al. 2021

1 To obtain publicly available survival data we used the online tool [www.kmplot.com](http://www.kmplot.com) (Gyórfy,  
2 2021). Briefly, expression data for OSBP and OSBPL2 was analysed in 719 patient samples  
3 identified histologically as lung adenocarcinoma. Patients were split by median expression to  
4 obtain high and low expression categories. For data visualisation and data analyses we used  
5 ggsurvplot function in ggplot2 using Rstudio. To meta-analyse histology data we used the  
6 human proteome atlas (Uhlen et al., 2015).  
7 Raw data analyses and plotting were carried out in Rstudio using ggplot2 and other appropriate  
8 packages. Superplots were used to show data obtained from repeated experiments and were  
9 prepared according to the guidelines published elsewhere (Lord et al., 2020). On these plots,  
10 each colour represents data obtained from one experiment, and filled dots correspond to mean  
11 values. Mean values between conditions were compared by unpaired t-test to confirm  
12 statistical significance. Differences were considered statistically significant when p values were  
13 smaller than 0.05. Other statistical tests used for data analyses are indicated in each figure  
14 legend.  
15  
16  
17  
18  
19  
20  
21  
22  
23  
24  
25  
26  
27  
28  
29  
30  
31  
32  
33  
34  
35  
36  
37



Kovács et al. 2021

## 1 **Supplementary methods**

### 2 **Chemicals used for lipid analyses**

3 Extraction: 2,6-Di-tert-butyl-4-methylphenol or  $[(\text{CH}_3)_3\text{C}]_2\text{C}_6\text{H}_2(\text{CH}_3)\text{OH}$  (Sigma, 34750),  
4 Chloroform or  $\text{CHCl}_3$  (Sigma, 34854), Methanol or  $\text{CH}_3\text{OH}$  (Sigma, 34860).  
5 Quantification: Sodium dihydrogen phosphate dihydrate or  $\text{NaH}_2\text{PO}_4 \cdot 2\text{H}_2\text{O}$  (VWR,  
6 28011.291), Ammonium molybdate tetrahydrate or  $(\text{NH}_4)_6\text{Mo}_7\text{O}_{24} \cdot 4\text{H}_2\text{O}$  (Sigma, A7302), L-  
7 ascorbic acid or  $\text{C}_6\text{H}_8\text{O}_6$  (Sigma, 33034), Perchloric acid or  $\text{HClO}_4$  (Carlo Erba, 409193).  
8 HP-TLC: Toluene or  $\text{C}_6\text{H}_5\text{CH}_3$  (Sigma, 244511), Hexane or  $\text{CH}_3(\text{CH}_2)_4\text{CH}_3$  (Sigma/Merck,  
9 208752), Chloroform or  $\text{CHCl}_3$  (Sigma, 34854), Methanol or  $\text{CH}_3\text{OH}$  (Sigma, 34860), 1-  
10 Propanol or  $\text{CH}_3\text{CH}_2\text{CH}_2\text{OH}$  (Sigma, 402893), Ethyl acetate (VWR, 23880.290), Sulfuric acid  
11 or  $\text{H}_2\text{SO}_4$  (VWR, 20700.298), Copper(II) sulfate pentahydrate or  $\text{CuSO}_4 \cdot 5\text{H}_2\text{O}$  (Sigma,  
12 C8027), ortho-Phosphoric acid 99% or  $\text{H}_3\text{PO}_4$  (Supelco, 1.00565.0500), magnesium chloride  
13 hexahydrate or  $\text{MgCl}_2 \cdot 6\text{H}_2\text{O}$  (VWR, 25108.295). Lipid standards were acquired from Avanti®  
14 Polar Lipids – egg LPC, SM, egg PC, brain PS, liver PI, heart CL, egg PA, liver PE, egg PG,  
15 MSGCer (d18:1/17:0), GlucCer (d18:1/17:0), Egg Cer, MG 18:1, DG1.2 2x18:0, DG1.3, TG  
16 3x18:1, ChoE 17:0 – with the exception of Cholesterol (Sigma, C8667), ChoF (Merck,  
17 S448532) and AA (Sigma, A3555).

18  
19  
20  
21

### 22 **High-performance thin-layer chromatography (HP-TLC)**

23 Cells suspensions containing  $8 \times 10^6$  cells were divided into two equal parts to obtain cell pellets  
24 by centrifugation for either protein quantification or lipid extractions. Protein concentrations  
25 were determined as detailed above. For lipid extraction, cell pellets were extracted with the  
26 Bligh and Dyer method mentioned above with modifications. Quantification of phospholipids in  
27 total lipid extracts was based on the assay (Rouser et al., 1970) with minor modifications. An  
28 automatic TLC Sampler 4 (ATS4, CAMAG) was used to apply a total amount of 20  $\mu\text{g}$  of  
29 phospholipid per sample in duplicates, lipid standards for identification and cholesterol  
30 standards (Avanti?) onto a Merck HPTLC glass plate silica gel 60 (20x10cm, layer thickness  
31 200  $\mu\text{m}$ ).

32 HP-TLC was performed in sequential elution, the first 5 in an automated multiple development  
33 chamber (AMD2, CAMAG), then the following 3 in an automatic developing chamber (ADC2,  
34 CAMAG) with humidity control achieved with a  $\text{MgCl}_2 \cdot 5\text{H}_2\text{O}$  solution. Solvent systems' %  
35 distribution by order of elution: Ethyl acetate, 1-propanol, chloroform, methanol, 0.25% (W/V)  
36 aqueous potassium chloride, 1) 24:30:27:11:8, 2) 27:27:27:11:8, 3) 27:27:27:19:0, all up to 50  
37 mm; 4) Ethyl acetate, chloroform (50:50), up to 55 mm; 5) Ethyl acetate, chloroform (30:70),

Kovács et al. 2021

1 up to 60 mm; 6) Hexane, ethyl acetate (60:40), up to 70 mm; 7) toluene up to 78 mm; 8) hexane  
2 up to 85 mm.

3 Plate surface was sprayed with a modified copper sulphate solution (Handloser et al., 2008)  
4 and revealed by heating at 100°C in a plate heater (CAMAG) for 25-30 min, then 5-10 min at  
5 140°C. Imaging was done in a Fusion FX7 instrument (Vilber Loumat), using epi white light.  
6 Identification of the different classes of PL was carried out by comparison to PL standards  
7 applied in the TLC plate.

8 Plate images were analysed in Fiji, by determining peak areas corresponding to each lipid  
9 band of interest. Lipid distribution (%) of each lipid class was calculated per lane by dividing  
10 the peak area obtained for each band of interest by the sum of all peak areas of interest used  
11 in the same lane. Cholesterol quantification in each lane was calculated from a cholesterol  
12 standard quantification curve, then normalised to protein concentrations.

13  
14

### 15 **Detailed lipidomics analyses**

16 Acetonitrile (ACN) and isopropanol (IPA) were purchased from Carlo Erba. Chloroform  
17 (CHCl<sub>3</sub>) was purchased from Merck. These solvents were LC-MS grade. Methanol (MeOH)  
18 was from VWR. Formic acid Optima LC-MS quality was purchased from Thermo Fisher  
19 Scientific. Ultrapure water was from Purelab flex (Veolia Water), and formate ammonium (99%)  
20 was from Acros Organics.

21 The extraction was performed using 1.5 mL solvent-resistant plastic Eppendorf tubes and 5  
22 mL glass hemolyse tubes to avoid contamination. Methanol, chloroform and water should each  
23 be cooled down on wet ice before the lipid extraction.

24 A modified Bligh and Dyer was used for lipid extraction. One million cells were collected and  
25 pelleted in an eppendorf and 200 µL water was added. After vortexing (30s), the sample was  
26 transferred in a glass tube. 500 µL of methanol were used to rinse the Eppendorf tube and then  
27 transferred in the glass tube to which 250 µL of chloroform were finally added. The mixture was  
28 vortexed for 10 min before a new addition of 250 µL of water and 250 µL of chloroform. The  
29 mixture was vortexed again for 10 min and finally centrifuged (2500 rpm, 4°C, 10 minutes).  
30 Then, 400 µL of the organic phase was collected in a new glass tube and dried under a stream  
31 of nitrogen. The dried extract was resuspended in 60 µL of methanol/chloroform 1:1 (v/v) and  
32 transferred in an injection vial.

33 Reverse phase liquid chromatography was selected for separation with an UPLC system  
34 (Ultimate 3000, Thermo Fisher Scientific). Lipid extracts were separated on an Accucore  
35 C18 (150x2.1, 2.5µm) column (Thermo Fisher Scientific) operated at 400 µL/ minutes flow rate.  
36 The injection volume was 3 µL. Eluent solutions were ACN/H<sub>2</sub>O 50/50 (V/V) containing 10 mM  
37 ammonium formate and 0.1% formic acid (solvent A) and IPA/ACN/H<sub>2</sub>O 88/10/2 (V/V)

Kovács et al. 2021

1 containing 2 mM ammonium formate and 0.02% formic acid (solvent B). The step gradient of  
2 elution was in %B: 0.0 min, 35%; 0.0-4.0 min, 35 to 60%; 4.0-8.0 min, 60 to 70%; 8.0-16.0 min,  
3 70 to 85%; 16.0-25.0 min, 85 to 97%; 25-25.1 min 97 to 100% B, 25.1-31 min 100% B and  
4 finally the column was reconditioned at 35% B for 4 min. The UPLC system was coupled with  
5 a Q-exactive Mass Spectrometer (Thermo Fisher Scientific); equipped with a heated  
6 electrospray ionization (HESI) probe. This spectrometer was controlled by Xcalibur software  
7 (version 4.1.31.9.) and operated in electrospray positive mode.  
8 Data were acquired with dd-MS2 mode. MS spectra were acquired at a resolution of 70 000  
9 (200 m/z) in a mass range of 250–1200 m/z with an AGC target 1e6 value of and a maximum  
10 injection time of 100ms. 15 most intense precursor ions were selected and isolated with a  
11 window of 1 m/z and fragmented by HCD (Higher energy C-Trap Dissociation) with normalized  
12 collision energy (NCE) of 25 and 30 eV. MS/MS spectra were acquired in the ion trap with an  
13 AGC target 1e5 value, the resolution was set at 35 000 at 200 m/z combined with an injection  
14 time of 80 ms.  
15 Data were reprocessed using Lipid Search 4.2.21 (Thermo Fisher Scientific). The product  
16 search mode was used and the identification was based on the accurate mass of precursor  
17 ions and MS2 spectral pattern. The parameters for the ion identification and alignment were  
18 set up as follow: ion precursor tolerance 5 ppm; ion product tolerance 5 ppm; ion and adducts  
19 searched [H+], [NH4+] and [Na+]; alignment retention time tolerance 0.4 min; ID quality filters  
20 A, B and C.

1 **Figure legends**

2 **Figure 1. OSBP is highly expressed in epithelial cells**

- 3 (A) Expression heatmap of epithelial, mesenchymal and ORP genes across cell lines of the  
4 Cancer Cell Line Encyclopedia collection.  
5 (B) Calculated epithelial-mesenchymal indexes corresponding to each cell line.  
6 (C) Correlation between epithelial-mesenchymal index and ORP expression reveals epithelial  
7 and mesenchymal-specific ORPs.  
8 (D) Low OSBP and OSBPL2 expression are associated to a poor clinical outcome in lung  
9 adenocarcinoma patients. P-values were calculated by Gehan-Breslow-Wilcoxon test. LUAD:  
10 Lung adenocarcinoma.  
11 (E) TGFbeta-induced expression changes in master EMT-transcription factors and selected  
12 ORP genes measured by RT-qPCR. Means are calculated from three independent  
13 experiments. \*p<0.05; \*\*p<0.01; \*\*\*\*p<0.001; ns=non-significant, Welch's t test.  
14  
15

16 **Figure 2. OSBP regulates epithelial polarity**

- 17 (A) OSBP silencing affects MDCK cyst morphology. Representative cysts stained with  
18 apical/basolateral markers are shown. Bar=10  $\mu\text{m}$   
19 (B) Efficacy of RNAi-based OSBP silencing was tested 4 days post-nucleofection in MDCK  
20 cells.  
21 (C) OSBP silencing increases the frequency of MDCK cysts with morphology defects. Means  
22 were calculated from three independent experiments. Each experiment was done in  
23 triplicates/condition and statistics was obtained by counting at least 70 cyst/triplicate. P-value  
24 was calculated by unpaired t test.  
25 (D) Overnight treatment of preformed MDCK cysts with 0.5  $\mu\text{M}$  SWG disrupts polarized  
26 morphology. Representative cysts stained for apical/basolateral markers are shown.  
27  
28

29 **Figure 3. OSBP proximity landscape highlights secretory cargoes depending on ER-  
30 TGN contact sites**

- 31 (A) Confocal microscopy shows the OSBP-TurboID-derived biotinylation signal in MDCK cells.  
32 Cells stably expressed bGalT1-BFP to label TGN. OSW-1 was used in 50 nM and SWG was  
33 applied in 0.5  $\mu\text{M}$  concentration for 1 h. Bar=15  $\mu\text{m}$ .  
34 (B) Superplot showing TGN-enrichment of OSBP-TurboID upon OSW-1 and SWG treatments.  
35 Means obtained from three independent experiments were compared by Welch's t test.  
36 (C) Venn diagram showing the filtering of the identified hits detected by mass spectrometry.  
37 (D) Numerous well-characterized OSBP-partners were identified in the OSBP proximity  
38 proteome. See complete list in **Source Data 1**.  
39 (E) Classification of identified hits by cellular components shows that a large portion of the  
40 OSBP-proximity proteins are localised to the plasma membrane.  
41 (F) GO cellular component enrichment analyses shows significant enrichment in multiple GO  
42 classes.  
43 (G) Classification of identified hits according to their response to 1 h 0.5  $\mu\text{M}$  SWG treatment.  
44 (H) Enrichment of hits belonging to specific GO classes shows different profiles to SWG  
45 treatment.  
46 (I-M) Mapping hits belonging to indicated GO classes shows different distributions across the  
47 proximity interactome.

1  
2  
3  
4  
5  
6  
7  
8  
9  
10  
11  
12  
13  
14  
15  
16  
17  
18  
19  
20  
21  
22  
23  
24  
25  
26  
27  
28  
29  
30  
31

### Figure 4. OSBP controls E-cadherin trafficking

(A) Confocal imaging shows that incubating OSBP-TurboID expressing MDCK cells for 2 h after biotin treatment results in the enrichment of biotinylation signal at cell-cell junctions (arrowheads). Bar=12  $\mu\text{m}$

(B) Live epifluorescent imaging shows the arrest of E-cadherin secretion at the Golgi membranes upon ORPphilin treatments (0.5  $\mu\text{M}$  SWG and 20 nM OSW-1). Black arrowheads points to cell-surface localised E-cadherin. Bar=10  $\mu\text{m}$

(C) Kinetics of the E-cadherin RUSH experiments. One representative experiment is shown. Each line corresponds to one cell and bold lines with the shaded area indicate mean $\pm$ 95% confidence interval. P-values were calculated by unpaired t test.

(D) Immunolabelling of endogenous E-cadherin observed by confocal microscopy. Bar=20  $\mu\text{m}$ .

(E) Immunolabelling of endogenous beta-catenin observed by confocal microscopy. SWG was used in 0.5  $\mu\text{M}$  and OSW-1 in 2 nM upon experiments shown on both D and E. Bar=20  $\mu\text{m}$ .

(F) Superplot showing E-cadherin enrichment in the TGN upon ORPphilin treatment. Means obtained from three independent experiments were compared by Welch's t test.

(G) Superplot showing beta-catenin enrichment in the TGN upon ORPphilin treatment. Means obtained from three independent experiments were compared by Welch's t test.

(H) Representative colonies showing the effect of ORPphilin treatments (0.5  $\mu\text{M}$  SWG and 2 nM OSW-1) on cell scattering. Bar=60  $\mu\text{m}$

(I) Cell scattering was quantified by measuring colony perimeters. Each line corresponds to one colony and bold lines with the shaded area indicate mean $\pm$ 95% confidence interval. P-values were calculated by unpaired t test.

(J) Co-expressed mCherry-E-cadherin and ssEGFP rush cargoes in MDCK cells show different sensitivities toward 20 nM OSW-1 treatment. Empty arrowheads indicate Golgi membranes while black arrowheads point to surface-localised E-cadherin. Bar=10  $\mu\text{m}$

(K) Quantification of the co-expression experiment. One representative experiment is shown. Each line indicates mean $\pm$ 95% confidence interval. DMSO n=11, OSW-1 n=16. P-values were calculated by unpaired t test.

### Figure 5. OSBP-derived cholesterol regulates cell polarity and E-cadherin secretion

(A) The cholesterol probe D4H-GFP decorates the basolateral membrane of 3D-cultured MDCK cells. Upon OSBP silencing, an altered D4H-GFP distribution can be observed in the cysts displaying morphological defects. Bar=10  $\mu\text{m}$ .

(B) Overnight treatment of MDCK cysts expressing the cholesterol probe D4H-GFP results in disrupted distribution of cholesterol. Bar=10  $\mu\text{m}$ .

(C) Representative images of live cell microscopy of the effect of cholesterol depletion on E-cadherin secretion. Bar=10  $\mu\text{m}$

(D) Quantification of the live imaging of cholesterol-depleted cells. One representative experiment is shown. Each line corresponds to one cell and bold lines with shaded area indicate mean $\pm$ 95% confidence interval. P-values were calculated by unpaired t test.

(E) Representative colonies showing the effect of cholesterol depletion on epithelial cell scattering. Bar=80  $\mu\text{m}$

(F) Cell scattering was quantified by measuring the colony perimeters. Each line corresponds to one colony and bold lines with shaded area indicate mean $\pm$ 95% confidence interval. P-values were calculated by unpaired t test.

1  
2  
3  
4  
5  
6  
7  
8  
9  
10  
11  
12  
13  
14  
15  
16  
17  
18  
19  
20  
21  
22  
23  
24  
25  
26  
27  
28  
29  
30  
31  
32  
33  
34  
35  
36  
37  
38  
39  
40  
41  
42  
43  
44  
45  
46

**Figure 6. TGFbeta re-wires cholesterol homeostasis**

(A) Relative mRNA levels of genes involved in cholesterol homeostasis regulation measured by RT-qPCR. Bars show mean of three independent experiments. \* $p < 0.05$ ; \*\* $p < 0.01$ ; ns=non-significant, Welch's t test.

(B) Volcano plot shows the relative changes of each lipid species detected by mass spectrometry. Color code corresponds to acyl chain saturation. Complete data available in **Source Data 2**.

(C) Cholesterol content of control and TGFbeta-treated A549 cells measured by HP-TLC. Bars indicate the mean of three independent experiments. \* $p < 0.05$ , Welch's t test.

(D) PA-imaging of control and TGFbeta-treated A549 cells shows changes in membrane lipid order upon EMT. Bar=15  $\mu\text{m}$

(E) PA-imaging reveals membrane lipid-order changes upon spontaneous EMT. Bar=15  $\mu\text{m}$

**Figure 7. Mesenchymal progression is associated to changes in OSBP functions**

(A) Confocal microscopy shows the re-arrangement of OSBP pool in control and TGFbeta-treated A549 cells. Bar=20  $\mu\text{m}$ .

(B) Superplot shows the enrichment of OSBP signal in TGN in control and TGFbeta-treated cells. Means obtained from three independent experiments were compared by Welch's t test.

(C) Changes in TGN-enrichment of OSBP signal upon wound healing of A549 cells. Pseudo-colored image indicates TGN localised /Total OSBP intensity ratio. Bar= 80  $\mu\text{m}$ .

(D) OSBP TGN enrichment values upon wound healing. Each point represents one cell. Values on the x axis indicate the distance of the cells from the left border of the image.

(E) Confocal images of control and TGFbeta-treated A549 cells expressing the PI(4)P reporter GFP-P4M-SidM. Bar=15  $\mu\text{m}$ .

(F) Superplot shows the enrichment of GFP-P4M-SidM signal in TGN in control and TGFbeta-treated cells. Means obtained from three independent experiments were compared by Welch's t test.

(G) Confocal images of control and TGFbeta-stimulated A549 cells expressing GFP-PH-OSBP. Bar=15  $\mu\text{m}$ .

(H) Superplot shows the enrichment of GFP-PH-OSBP signal in TGN in control and TGFbeta-treated cells. Means obtained from three independent experiments were compared by Welch's t test.

(I) Live imaging of control and TGFbeta-treated A549 cells expressing GFP-P4M-SidM. 50nM OSW-1 was added to the cells 20 min after the start of the imaging. Bar=10  $\mu\text{m}$

(J) Averaged kymographs of Golgi regions of control and TGFbeta-treated A549 cells. Control n= 12, TGFbeta n=8. P-values were calculated by unpaired t test.

(K) Kinetics of the GFP-P4M-SidM experiments. One representative experiment is shown. Each line corresponds to one cell and bold lines with shaded area indicate mean $\pm$ 95% confidence interval. P-values were calculated by unpaired t test.

(L) Schematic representation of how TGFb-triggered EMT leads to elevated Golgi accumulation of OSBP.

(M) Live epifluorescent imaging of control and TGFbeta-treated cells shows different kinetics of E-cadherin secretion. Bar=10  $\mu\text{m}$

Kovács et al. 2021

- 1 (N) Quantification of the live imaging. One representative experiment is shown. Each line
- 2 corresponds to one cell and bold lines with shaded area indicate mean $\pm$ 95% confidence
- 3 interval. P-values were calculated by unpaired t test.

1 **Expanded View Figures legends**

2 **Figure EV1.**

3 (A) Correlation matrix comparing ORP expression values and epithelial-mesenchymal index  
4 corresponding to cell lines included in the Cancer Cell Line Encyclopedia. Corr=Pearson R,  
5 \*P<0.05, \*\*P<0.01, \*\*\*P<0.005.

6 (B) Gene expression heatmap containing expression values for mesenchymal, epithelial  
7 marker genes as well as ORP genes of TCGA lung adenocarcinoma cohort.

8 (C) Correlation matrix comparing ORP expression values and epithelial-mesenchymal indexes  
9 corresponding to tumour specimens included in the TCGA lung adenocarcinoma cohort.  
10 Corr=Pearson R, \*P<0.05, \*\*P<0.01, \*\*\*P<0.005.

11 (D) Calculated epithelial-mesenchymal indices corresponding to each lung adenocarcinoma  
12 patient sample.

13 (E) Correlations between epithelial-mesenchymal index and ORP expression values in TCGA  
14 lung adenocarcinoma samples.

15 (F) Histology samples from The Human Protein Atlas show high epithelial-specific OSBP and  
16 OSBPL2 staining.

17

18 **Figure EV2.**

19 (A) Domain structure of the OSBP-TurboID-HA construct stably expressed in MDCK cells.

20 (B) Experimental design of the TurboID experiment.

21 (C) Biotinylation profiles of cell lysates obtained from wild type MDCK or MDCK-OSBP-  
22 TurboID-HA cells. Membranes probed by streptavidin-HRP confirm successful protein  
23 biotinylation in MDCK cells stably expressing OSBP-TurboID-HA. Note that SWG-treatment  
24 affects the biotinylation profile.

25 (D) Elution profiles of streptavidin beads incubated with lysates obtained from wild type MDCK  
26 or MDCK-OSBP-TurboID-HA cells. Biotinylated proteins were enriched on streptavidin beads,  
27 then beads were eluted by boiling, elution fractions were resolved on SDS-PAGE and revealed  
28 by silver staining. Elution profiles are comparable to biotinylation profiles shown on panel B.

29 (E) 781 common hits were identified between the MDCK surface proteome (Caceres et al.,  
30 2019) and the OSBP proximity proteome (this study).

31 (F) By analysing the overlapping hits, no correlation between apico-basal localization (Ap%)  
32 and the identified peptide numbers of the OSBP proximity partners can be established.

33 (G) Enrichment analyses of GO terms classified by Molecular function.

34 (H) Enrichment analyses of GO terms classified by Biological processes.

35

36 **Figure EV3.**

37 (A) MDCK cells were transfected with control plasmid or with OSBP-TurboID-HA-expressing  
38 plasmid then biotinylated for 10 min on the next day. 5% of the cell lysates were kept for input  
39 control then biotinylated proteins were enriched on streptavidin beads. Beads were eluted by  
40 boiling, then samples were resolved on SDS-PAGE and transferred to membranes to probe  
41 with streptavidin-HRP or with specific antibodies. VAP B and Tubulin were used as positive  
42 and negative controls, respectively. Compared to the input samples, only a minor sample of  
43 the total E-cadherin pool was biotinylated.

44 (B) Confocal microscopic analysis of MDCK cells co-expressing E-cadherin and ssEGFP  
45 RUSH cargoes and treated with biotin for the indicated times. Bar=12  $\mu$ m.

46

47

48



Kovács et al. 2021

1 **Figure EV4.**

2 (A) Photograph of the HP-TLC plate used for lipid class quantification. Abbreviation: STE –  
3 sterol esters, TG – triglycerides, PE – Phosphatidyl ethanolamines, CL – Cardiolipin, PI –  
4 Phosphatidyl inositols, PS – Phosphatidyl serines, PC – Phosphatidyl cholines, SM –  
5 Sphingomyelins.

6 (B) Quantification of lipid classes in control (C) and TGFbeta-treated A549 cells detected by  
7 HP-TLC. Bars indicate the mean of three independent experiments. \* $p < 0.05$ ; \*\* $p < 0.01$ ;  
8 \*\*\* $p < 0.005$ ; \*\*\*\* $p < 0.001$ ; ns=non-significant, Welch's t test.

9  
10 **Figure EV5.**

11 (A) Western blot experiments showing the change of OSBP protein expression through EMT.  
12 3 independent experiments are shown. E-cadherin was used as an epithelial marker, while N-  
13 cadherin and Vimentin served as mesenchymal markers.

14 (B) Quantification of western blots shown in panel A.

15 (C) siRNA-mediated silencing of OSBP does not affect EMT marker expressions.

16 (D) A549 cells were treated 24 h with SWG and OSW-1 at 10; 100 and 1000 nM concentrations  
17 then E-cadherin and Vimentin levels were detected by western blotting. Uncleaved Pro-E-  
18 cadherin appears on the blots upon ORPphilin treatments .

19 (E) TGFbeta can change the expression of EMT markers in the absence of OSBP.

20 (F) A549 cells can re-express E-cadherin after washing-out TGFbeta-from the cells in the  
21 absence of OSBP as well.

22 (G) OSBP is more enriched in the Golgi in HGF-stimulated MDCK cells compared to control  
23 cells. Bar= 20  $\mu\text{m}$

24 (H) Superplot showing the redistribution of OSBP pools in HGF-treated MDCK cells. Means  
25 obtained from three independent experiments were compared by Welch's t test.

26 (I-J) Kinetics of the GFP-P4M-SidM experiments in control and HGF-stimulated MDCK cells.  
27 One representative experiment is shown. OSW-1 was added to the cells in 50 nM  
28 concentration 6 minutes after starting the experiment. Each line corresponds to one cell and  
29 bold lines with shaded area indicate mean $\pm$ 95% confidence interval. Bar=10  $\mu\text{m}$

30  
31

32 **Supplementary materials**

33 **Movie EV1**

34 **Movie EV2**

35 **Movie EV3**

36 **Movie EV4**

37 **Movie EV5**

38 **Movie EV6**

39

40 **Source Data 1 – Proteomics data**

41 **Source Data 2 – Lipidomics data**

42 **Supplementary Table**

43

44

45

46

47

48

Kovács et al. 2021

1 **Acknowledgement**

2 We are grateful for Frédéric Brau, Sophie Abélanet, Julie Cazareth and Nathalie Leroudier for  
3 their technical contribution. We thank Fanny Roussi for providing SWG. This work was  
4 supported by la Fondation pour la Recherche Médicale (DEQ20180339156) and the European  
5 Research Council (856404 — SPHERES). A post-doctoral fellowship to DK was provided by  
6 Agence National de la Recherche within the project entitled as Investissements d’Avenir  
7 UCA<sup>JEDI</sup> (ANR-15-IDEX-01).

8

9 **Author contributions**

10 DK, BA, BM and FL designed and conceptualised the research project. BA supervised the  
11 work. DK carried out the experiments. AP contributed to cloning design and molecular biology.  
12 ASG, LF and DD performed mass spectrometry, lipidomics and proteomics. ARDA performed  
13 lipid extractions and HPTLC. DK, BA analysed the data and wrote the manuscript.

14

15 **Conflict of interest**

16 The authors declare that they have no conflict of interest.

## 1 References

- 2 Antonny, B., Bigay, J., & Mesmin, B. (2018). The Oxysterol-Binding Protein Cycle: Burning  
3 Off PI(4)P to Transport Cholesterol. *Annual Review of Biochemistry*, 87(1), 809–837.  
4 <https://doi.org/10.1146/annurev-biochem-061516-044924>
- 5 Barretina, J., Caponigro, G., Stransky, N., Venkatesan, K., Margolin, A. A., Kim, S., Wilson,  
6 C. J., Lehár, J., Kryukov, G. v., Sonkin, D., Reddy, A., Liu, M., Murray, L., Berger, M. F.,  
7 Monahan, J. E., Morais, P., Meltzer, J., Korejwa, A., Jané-Valbuena, J., ... Garraway, L.  
8 A. (2012). The Cancer Cell Line Encyclopedia enables predictive modelling of  
9 anticancer drug sensitivity. *Nature*, 483(7391), 603–607.  
10 <https://doi.org/10.1038/nature11003>
- 11 Beh, C. T., Cool, L., Phillips, J., & Rine, J. (2001). Overlapping functions of the yeast  
12 oxysterol-binding protein homologues. *Genetics*, 157(3), 1117–1140.  
13 <https://doi.org/10.1093/genetics/157.3.1117>
- 14 Bligh, E. G., & Dyer, W. J. (1959). A RAPID METHOD OF TOTAL LIPID EXTRACTION AND  
15 PURIFICATION. *Canadian Journal of Biochemistry and Physiology*, 37(8), 911–917.  
16 <https://doi.org/10.1139/o59-099>
- 17 Blume, J. von, & Hausser, A. (2019). *Lipid-dependent coupling of secretory cargo sorting and*  
18 *trafficking at the trans-Golgi network*. 593, 2412–2427. [https://doi.org/10.1002/1873-](https://doi.org/10.1002/1873-3468.13552)  
19 [3468.13552](https://doi.org/10.1002/1873-3468.13552)
- 20 Bohnert, M. (2020). Tether Me, Tether Me Not—Dynamic Organelle Contact Sites in  
21 Metabolic Rewiring. *Developmental Cell*, 54(2), 212–225.  
22 <https://doi.org/10.1016/j.devcel.2020.06.026>
- 23 Boncompain, G., Divoux, S., Gareil, N., de Forges, H., Lescure, A., Latreche, L., Mercanti,  
24 V., Jollivet, F., Raposo, G., & Perez, F. (2012). Synchronization of secretory protein  
25 traffic in populations of cells. *Nature Methods*, 9(5), 493–498.  
26 <https://doi.org/10.1038/nmeth.1928>
- 27 Boncompain, G., & Weigel, A. v. (2018). Transport and sorting in the Golgi complex: multiple  
28 mechanisms sort diverse cargo. *Current Opinion in Cell Biology*, 50, 94–101.  
29 <https://doi.org/10.1016/j.ceb.2018.03.002>
- 30 Branon, T. C., Bosch, J. A., Sanchez, A. D., Udeshi, N. D., Svinkina, T., Carr, S. A.,  
31 Feldman, J. L., Perrimon, N., & Ting, A. Y. (2018). Efficient proximity labeling in living  
32 cells and organisms with TurboID. *Nature Biotechnology*, 36(9), 880–898.  
33 <https://doi.org/10.1038/nbt.4201>
- 34 Burgett, A. W. G., Poulsen, T. B., Wangkanont, K., Anderson, D. R., Kikuchi, C., Shimada,  
35 K., Okubo, S., Fortner, K. C., Mimaki, Y., Kuroda, M., Murphy, J. P., Schwalb, D. J.,  
36 Petrella, E. C., Cornella-Taracido, I., Schirle, M., Tallarico, J. A., & Shair, M. D. (2011).  
37 Natural products reveal cancer cell dependence on oxysterol-binding proteins. *Nature*  
38 *Chemical Biology*, 7(9), 639–647. <https://doi.org/10.1038/nchembio.625>
- 39 Caceres, P. S., Gravotta, D., Zager, P. J., Dephoure, N., & Rodriguez-Boulant, E. (2019).  
40 Quantitative proteomics of MDCK cells identify unrecognized roles of clathrin adaptor  
41 AP-1 in polarized distribution of surface proteins. *Proceedings of the National Academy*  
42 *of Sciences of the United States of America*, 116(24), 11796–11805.  
43 <https://doi.org/10.1073/pnas.1821076116>
- 44 Cao, X., Surma, M. A., & Simons, K. (2012). Polarized sorting and trafficking in epithelial  
45 cells. *Cell Research*, 22(5), 793–805. <https://doi.org/10.1038/cr.2012.64>
- 46 Carmona, F. J., Davalos, V., Vidal, E., Gomez, A., Heyn, H., Hashimoto, Y., Vizoso, M.,  
47 Martinez-Cardus, A., Sayols, S., Ferreira, H. J., Sánchez-Mut, J. v., Morán, S., Margelí,  
48 M., Castella, E., Berdasco, M., Stefansson, O. A., Eyfjord, J. E., Gonzalez-Suarez, E.,  
49 Dopazo, J., ... Esteller, M. (2014). A comprehensive DNA methylation profile of  
50 epithelial-to-mesenchymal transition. *Cancer Research*, 74(19), 5608–5619.  
51 <https://doi.org/10.1158/0008-5472.CAN-13-3659>
- 52 Cerami, E., Gao, J., Dogrusoz, U., Gross, B. E., Sumer, S. O., Aksoy, B. A., Jacobsen, A.,  
53 Byrne, C. J., Heuer, M. L., Larsson, E., Antipin, Y., Reva, B., Goldberg, A. P., Sander,  
54 C., & Schultz, N. (2012). The cBio Cancer Genomics Portal: An Open Platform for

Kovács et al. 2021

- 1 Exploring Multidimensional Cancer Genomics Data: Figure 1. *Cancer Discovery*, 2(5),  
2 401–404. <https://doi.org/10.1158/2159-8290.CD-12-0095>
- 3 Chen, Y. T., Stewart, D. B., & Nelson, W. J. (1999). Coupling assembly of the E-  
4 cadherin/beta-catenin complex to efficient endoplasmic reticulum exit and basal-lateral  
5 membrane targeting of E-cadherin in polarized MDCK cells. *The Journal of Cell Biology*,  
6 144(4), 687–699. <https://doi.org/10.1083/jcb.144.4.687>
- 7 Curtis, M. W., Johnson, K. R., & Wheelock, M. J. (2008). E-cadherin/catenin complexes are  
8 formed cotranslationally in the endoplasmic reticulum/Golgi compartments. *Cell*  
9 *Communication & Adhesion*, 15(4), 365–378.  
10 <https://doi.org/10.1080/15419060802460748>
- 11 Das, A., Brown, M. S., Anderson, D. D., Goldstein, J. L., & Radhakrishnan, A. (2014). Three  
12 pools of plasma membrane cholesterol and their relation to cholesterol homeostasis.  
13 *ELife*, 2014(3), 1–16. <https://doi.org/10.7554/eLife.02882>
- 14 David, Y., & Castro, I. G. (2021). *The Fast and the Furious : Golgi Contact Sites*.  
15 <https://doi.org/10.1177/25152564211034424>
- 16 Dongre, A., & Weinberg, R. A. (2019). New insights into the mechanisms of epithelial–  
17 mesenchymal transition and implications for cancer. *Nature Reviews Molecular Cell*  
18 *Biology*, 20(2), 69–84. <https://doi.org/10.1038/s41580-018-0080-4>
- 19 Du, D., Xu, F., Yu, L., Zhang, C., Lu, X., Yuan, H., Huang, Q., Zhang, F., Bao, H., Jia, L., Wu,  
20 X., Zhu, X., Zhang, X., Zhang, Z., & Chen, Z. (2010). The Tight Junction Protein,  
21 Occludin, Regulates the Directional Migration of Epithelial Cells. *Developmental Cell*,  
22 18(1), 52–63. <https://doi.org/10.1016/j.devcel.2009.12.008>
- 23 Dukhovny, A., Yaffe, Y., Shepshalovitch, J., & Hirschberg, K. (2009). The length of cargo-  
24 protein transmembrane segments drives secretory transport by facilitating cargo  
25 concentration in export domains. *Journal of Cell Science*, 122(11), 1759–1767.  
26 <https://doi.org/10.1242/jcs.039339>
- 27 Giudetti, A. M., de Domenico, S., Ragusa, A., Lunetti, P., Gaballo, A., Franck, J., Simeone,  
28 P., Nicolardi, G., de Nuccio, F., Santino, A., Capobianco, L., Lanuti, P., Fournier, I.,  
29 Salzet, M., Maffia, M., & Vergara, D. (2019). A specific lipid metabolic profile is  
30 associated with the epithelial mesenchymal transition program. *Biochimica et*  
31 *Biophysica Acta - Molecular and Cell Biology of Lipids*, 1864(3), 344–357.  
32 <https://doi.org/10.1016/j.bbalip.2018.12.011>
- 33 Goto, A., Liu, X., Robinson, C. A., & Ridgway, N. D. (2012). Multisite phosphorylation of  
34 oxysterol-binding protein regulates sterol binding and activation of sphingomyelin  
35 synthesis. *Molecular Biology of the Cell*, 23(18), 3624–3635.  
36 <https://doi.org/10.1091/mbc.E12-04-0283>
- 37 Guillaume, E., Comunale, F., do Khoa, N., Planchon, D., Bodin, S., & Gauthier-Rouvière, C.  
38 (2013). Flotillin microdomains stabilize cadherins at cell-cell junctions. *Journal of Cell*  
39 *Science*, 126(22), 5284–5292. <https://doi.org/10.1242/jcs.133975>
- 40 Györfy, B. (2021). Survival analysis across the entire transcriptome identifies biomarkers  
41 with the highest prognostic power in breast cancer. *Computational and Structural*  
42 *Biotechnology Journal*, 19, 4101–4109. <https://doi.org/10.1016/j.csbj.2021.07.014>
- 43 Hajek, R., Sevcikova, S., Kubiczkova, L., & Sedlarikova, L. (2012). TGF-beta -- an excellent  
44 servant but a bad master. *Journal of Translational Medicine*, 10(1), 183.  
45 <https://doi.org/10.1186/1479-5876-10-183>
- 46 Handloser, D., Widmer, V., & Reich, E. (2008). Separation of Phospholipids by HPTLC – An  
47 Investigation of Important Parameters. *Journal of Liquid Chromatography & Related*  
48 *Technologies*, 31(13), 1857–1870. <https://doi.org/10.1080/10826070802188940>
- 49 Hao, Y., Baker, D., & Dijke, P. ten. (2019). TGF- $\beta$ -mediated epithelial-mesenchymal  
50 transition and cancer metastasis. *International Journal of Molecular Sciences*, 20(11).  
51 <https://doi.org/10.3390/ijms20112767>
- 52 Hoadley, K. A., Yau, C., Hinoue, T., Wolf, D. M., Lazar, A. J., Drill, E., Shen, R., Taylor, A.  
53 M., Cherniack, A. D., Thorsson, V., Akbani, R., Bowlby, R., Wong, C. K., Wiznerowicz,  
54 M., Sanchez-Vega, F., Robertson, A. G., Schneider, B. G., Lawrence, M. S.,  
55 Noushmehr, H., ... Mariamidze, A. (2018). Cell-of-Origin Patterns Dominate the

Kovács et al. 2021

- 1 Molecular Classification of 10,000 Tumors from 33 Types of Cancer. *Cell*, 173(2), 291-  
2 304.e6. <https://doi.org/10.1016/j.cell.2018.03.022>
- 3 Howard, S., Deroo, T., Fujita, Y., & Itasaki, N. (2011). A positive role of cadherin in wnt/ $\beta$ -  
4 catenin signalling during epithelial-mesenchymal transition. *PLoS ONE*, 6(8).  
5 <https://doi.org/10.1371/journal.pone.0023899>
- 6 Hua, W., ten Dijke, P., Kostidis, S., Giera, M., & Hornsveld, M. (2019). TGF $\beta$ -induced  
7 metabolic reprogramming during epithelial-to-mesenchymal transition in cancer. *Cellular  
8 and Molecular Life Sciences*, 0123456789. <https://doi.org/10.1007/s00018-019-03398-6>
- 9 Hung, V., Udeshi, N. D., Lam, S. S., Loh, K. H., Cox, K. J., Pedram, K., Carr, S. A., & Ting,  
10 A. Y. (2016). Spatially resolved proteomic mapping in living cells with the engineered  
11 peroxidase APEX2. *Nature Protocols*, 11(3), 456–475.  
12 <https://doi.org/10.1038/nprot.2016.018>
- 13 Jia, R., Liang, Y., Chen, R., Liu, G., Wang, H., Tang, M., Zhou, X., Wang, H., Yang, Y., Wei,  
14 H., Li, B., Song, Y., & Zhao, J. (2016). Osteopontin facilitates tumor metastasis by  
15 regulating epithelial-mesenchymal plasticity. *Cell Death & Disease*, 7(12), e2564.  
16 <https://doi.org/10.1038/cddis.2016.422>
- 17 Karimi Roshan, M., Soltani, A., Soleimani, A., Rezaie Kahkhaie, K., Afshari, A. R., &  
18 Soukhtanloo, M. (2019). Role of AKT and mTOR signaling pathways in the induction of  
19 epithelial-mesenchymal transition (EMT) process. *Biochimie*, 165, 229–234.  
20 <https://doi.org/10.1016/j.biochi.2019.08.003>
- 21 Keller, P., & Simons, K. (1997). Post-Golgi biosynthetic trafficking. *Journal of Cell Science*,  
22 110(24), 3001–3009.
- 23 Keller, P., & Simons, K. (1998). Cholesterol is required for surface transport of influenza virus  
24 hemagglutinin. *Journal of Cell Biology*, 140(6), 1357–1367.  
25 <https://doi.org/10.1083/jcb.140.6.1357>
- 26 Klemm, R. W., Ejsing, C. S., Surma, M. A., Kaiser, H. J., Gerl, M. J., Sampaio, J. L., de  
27 Robillard, Q., Ferguson, C., Proszynski, T. J., Shevchenko, A., & Simons, K. (2009).  
28 Segregation of sphingolipids and sterols during formation of secretory vesicles at the  
29 trans-Golgi network. *Journal of Cell Biology*, 185(4), 601–612.  
30 <https://doi.org/10.1083/jcb.200901145>
- 31 Kohn, K. W., Zeeberg, B. M., Reinhold, W. C., & Pommier, Y. (2014). Gene Expression  
32 Correlations in Human Cancer Cell Lines Define Molecular Interaction Networks for  
33 Epithelial Phenotype. *PLoS ONE*, 9(6), e99269.  
34 <https://doi.org/10.1371/journal.pone.0099269>
- 35 Lim, C., Davis, O. B., Shin, H. R., Zhang, J., Berdan, C. A., Jiang, X., Counihan, J. L., Ory, D.  
36 S., Nomura, D. K., & Zoncu, R. (2019). ER-lysosome contacts enable cholesterol  
37 sensing by mTORC1 and drive aberrant growth signalling in Niemann-Pick type C.  
38 *Nature Cell Biology*. <https://doi.org/10.1038/s41556-019-0391-5>
- 39 Loh, Chai, Tang, Wong, Sethi, Shanmugam, Chong, & Looi. (2019). The E-Cadherin and N-  
40 Cadherin Switch in Epithelial-to-Mesenchymal Transition: Signaling, Therapeutic  
41 Implications, and Challenges. In *Cells* (Vol. 8, Issue 10).  
42 <https://doi.org/10.3390/cells8101118>
- 43 Lord, S. J., Velle, K. B., Dyche Mullins, R., & Fritz-Laylin, L. K. (2020). SuperPlots:  
44 Communicating reproducibility and variability in cell biology. *Journal of Cell Biology*,  
45 219(6). <https://doi.org/10.1083/JCB.202001064>
- 46 Maekawa, M. (2017). Domain 4 (D4) of perfringolysin O to visualize cholesterol in cellular  
47 membranes — The update. *Sensors (Switzerland)*, 17(3), 1–14.  
48 <https://doi.org/10.3390/s17030504>
- 49 Mangoo-Karim, R., Uchic, M., Lechene, C., & Grantham, J. J. (1989). Renal epithelial cyst  
50 formation and enlargement in vitro: Dependence on cAMP. *Proceedings of the National  
51 Academy of Sciences of the United States of America*, 86(15), 6007–6011.  
52 <https://doi.org/10.1073/pnas.86.15.6007>
- 53 McFaline-Figueroa, J. L., Hill, A. J., Qiu, X., Jackson, D., Shendure, J., & Trapnell, C. (2019).  
54 A pooled single-cell genetic screen identifies regulatory checkpoints in the continuum of

- 1 the epithelial-to-mesenchymal transition. *Nature Genetics*, 51(9), 1389–1398.  
2 <https://doi.org/10.1038/s41588-019-0489-5>
- 3 Mcquin, C., Goodman, A., Chernyshev, V., Kametsky, L., Cimini, A., Karhohs, K. W., Doan,  
4 M., Ding, L., Rafelski, S. M., Thirstrup, D., Wiegraebe, W., Singh, S., Becker, T.,  
5 Caicedo, J. C., & Carpenter, A. E. (2018). CellProfiler 3.0: Next-generation image  
6 processing for biology. *PLoS Biology*, 1–17.
- 7 Mesmin, B., Bigay, J., Moser Von Filseck, J., Lacas-Gervais, S., Drin, G., & Antonny, B.  
8 (2013). XA four-step cycle driven by PI(4)P hydrolysis directs sterol/PI(4)P exchange by  
9 the ER-Golgi Tether OSBP. *Cell*, 155(4), 830. <https://doi.org/10.1016/j.cell.2013.09.056>
- 10 Mesmin, B., Bigay, J., Polidori, J., Jamecna, D., Lacas-Gervais, S., & Antonny, B. (2017).  
11 Sterol transfer, PI(4)P consumption, and control of membrane lipid order by  
12 endogenous OSBP. *The EMBO Journal*, 36(21), 3156–3174.  
13 <https://doi.org/10.15252/embj.201796687>
- 14 Mesmin, B., Kovacs, D., & D'Angelo, G. (2019). Lipid exchange and signaling at ER–Golgi  
15 contact sites. In *Current Opinion in Cell Biology* (Vol. 57, pp. 8–15).  
16 <https://doi.org/10.1016/j.ceb.2018.10.002>
- 17 Morandi, A., Taddei, M. L., Chiarugi, P., & Giannoni, E. (2017). Targeting the metabolic  
18 reprogramming that controls epithelial-to-mesenchymal transition in aggressive tumors.  
19 *Frontiers in Oncology*, 7(MAR), 1–19. <https://doi.org/10.3389/fonc.2017.00040>
- 20 Moreno-Bueno, G., Cubillo, E., Sarrió, D., Peinado, H., Rodríguez-Pinilla, S. M., Villa, S.,  
21 Bolós, V., Jordá, M., Fabra, A., Portillo, F., Palacios, J., & Cano, A. (2006). Genetic  
22 profiling of epithelial cells expressing E-cadherin repressors reveals a distinct role for  
23 snail, Slug, and E47 Factors in epithelial- mesenchymal transition. *Cancer Research*,  
24 66(19), 9543–9556. <https://doi.org/10.1158/0008-5472.CAN-06-0479>
- 25 Niko, Y., Didier, P., Mely, Y., Konishi, G., & Klymchenko, A. S. (2016). Bright and photostable  
26 push-pull pyrene dye visualizes lipid order variation between plasma and intracellular  
27 membranes. *Scientific Reports*, 6(1), 18870. <https://doi.org/10.1038/srep18870>
- 28 Ocaña, O. H., Córcoles, R., Fabra, Á., Moreno-Bueno, G., Aclouque, H., Vega, S., Barrallo-  
29 Gimeno, A., Cano, A., & Nieto, M. A. (2012). Metastatic Colonization Requires the  
30 Repression of the Epithelial-Mesenchymal Transition Inducer Prrx1. *Cancer Cell*, 22(6),  
31 709–724. <https://doi.org/10.1016/j.ccr.2012.10.012>
- 32 Péresse, T., Kovacs, D., Subra, M., Bigay, J., Tsai, M. C., Polidori, J., Gautier, R., Desrat, S.,  
33 Fleuriot, L., Debayle, D., Litaudon, M., Pham, V. C., Bignon, J., Antonny, B., Fanny  
34 Roussi, X., & Bruno Mesmin, X. (2020a). Molecular and cellular dissection of the  
35 oxysterol-binding protein cycle through a fluorescent inhibitor. *Journal of Biological  
36 Chemistry*, 295(13), 4277–4288. <https://doi.org/10.1074/jbc.RA119.012012>
- 37 Qin, Y., Meisen, W. H., Hao, Y., & Macara, I. G. (2010). Tuba, a Cdc42 GEF, is required for  
38 polarized spindle orientation during epithelial cyst formation. *Journal of Cell Biology*,  
39 189(4), 661–669. <https://doi.org/10.1083/jcb.201002097>
- 40 Rajapakse, V. N., Luna, A., Yamade, M., Loman, L., Varma, S., Sunshine, M., Iorio, F.,  
41 Sousa, F. G., Elloumi, F., Aladjem, M. I., Thomas, A., Sander, C., Kohn, K. W., Benes,  
42 C. H., Garnett, M., Reinhold, W. C., & Pommier, Y. (2018). CellMinerCDB for Integrative  
43 Cross-Database Genomics and Pharmacogenomics Analyses of Cancer Cell Lines.  
44 *IScience*, 10, 247–264. <https://doi.org/10.1016/j.isci.2018.11.029>
- 45 Resnik, N., de Luca, G. M. R., Sepčić, K., Romih, R., Manders, E., & Veranič, P. (2019).  
46 Depletion of the cellular cholesterol content reduces the dynamics of desmosomal  
47 cadherins and interferes with desmosomal strength. *Histochemistry and Cell Biology*.  
48 <https://doi.org/10.1007/s00418-019-01797-1>
- 49 Rouser, G., Fleischer, S., & Yamamoto, A. (1970). Two dimensional thin layer  
50 chromatographic separation of polar lipids and determination of phospholipids by  
51 phosphorus analysis of spots. *Lipids*, 5(5), 494–496.  
52 <https://doi.org/10.1007/BF02531316>
- 53 Sampaio, J. L., Gerl, M. J., Klose, C., Ejsing, C. S., Beug, H., Simons, K., & Shevchenko, A.  
54 (2011). Membrane lipidome of an epithelial cell line. *Proceedings of the National*

- 1 *Academy of Sciences of the United States of America*, 108(5), 1903–1907.  
2 <https://doi.org/10.1073/pnas.1019267108>
- 3 Schindelin, J., Arganda-Carreras, I., Frise, E., Kaynig, V., Longair, M., Pietzsch, T.,  
4 Preibisch, S., Rueden, C., Saalfeld, S., Schmid, B., Tinevez, J.-Y., White, D. J.,  
5 Hartenstein, V., Eliceiri, K., Tomancak, P., & Cardona, A. (2012). Fiji: an open-source  
6 platform for biological-image analysis. *Nature Methods*, 9(7), 676–682.  
7 <https://doi.org/10.1038/nmeth.2019>
- 8 Seveau, S., Bierne, H., Giroux, S., Préost, M. C., & Cossart, P. (2004). Role of lipid rafts in  
9 E-cadherin- and HGF-R/Met-mediated entry of *Listeria monocytogenes* into host cells.  
10 *Journal of Cell Biology*, 166(5), 743–753. <https://doi.org/10.1083/jcb.200406078>
- 11 Shigetomi, K., & Ikenouchi, J. (2019). Cell Adhesion Structures in Epithelial Cells Are  
12 Formed in Dynamic and Cooperative Ways. *BioEssays*, 1800227, 1800227.  
13 <https://doi.org/10.1002/bies.201800227>
- 14 Sugiki, T., Takeuchi, K., Yamaji, T., Takano, T., Tokunaga, Y., Kumagai, K., Hanada, K.,  
15 Takahashi, H., & Shimada, I. (2012). Structural basis for the Golgi association by the  
16 pleckstrin homology domain of the ceramide trafficking protein (CERT). *Journal of*  
17 *Biological Chemistry*, 287(40), 33706–33718. <https://doi.org/10.1074/jbc.M112.367730>
- 18 Takahashi, K., Kanerva, K., Vanharanta, L., Almeida-Souza, L., Lietha, D., Olkkonen, V. M.,  
19 & Ikonen, E. (2021). ORP2 couples LDL-cholesterol transport to FAK activation by  
20 endosomal cholesterol/PI(4,5)P 2 exchange. *The EMBO Journal*, 40(14), 1–20.  
21 <https://doi.org/10.15252/embj.2020106871>
- 22 Thiery, J. P. (2002). Epithelial–mesenchymal transitions in tumour progression. *Nature*  
23 *Reviews Cancer*, 2(6), 442–454. <https://doi.org/10.1038/nrc822>
- 24 Thomas, P. D. (2003). PANTHER: A Library of Protein Families and Subfamilies Indexed by  
25 Function. *Genome Research*, 13(9), 2129–2141. <https://doi.org/10.1101/gr.772403>
- 26 Tokuda, E., Itoh, T., Hasegawa, J., Ijuin, T., Takeuchi, Y., Irino, Y., Fukumoto, M., &  
27 Takenawa, T. (2014). Phosphatidylinositol 4-phosphate in the golgi apparatus regulates  
28 cell-cell adhesion and invasive cell migration in human breast cancer. *Cancer Research*,  
29 74(11), 3054–3066. <https://doi.org/10.1158/0008-5472.CAN-13-2441>
- 30 Uhlen, M., Fagerberg, L., Hallstrom, B. M., Lindskog, C., Oksvold, P., Mardinoglu, A.,  
31 Sivertsson, A., Kampf, C., Sjostedt, E., Asplund, A., Olsson, I., Edlund, K., Lundberg, E.,  
32 Navani, S., Szgyarto, C. A.-K., Odeberg, J., Djureinovic, D., Takanen, J. O., Hober, S.,  
33 ... Ponten, F. (2015). Tissue-based map of the human proteome. *Science*, 347(6220),  
34 1260419–1260419. <https://doi.org/10.1126/science.1260419>
- 35 Wahl, J. K., Kim, Y. J., Cullen, J. M., Johnson, K. R., & Wheelock, M. J. (2003). N-cadherin-  
36 catenin complexes form prior to cleavage of the proregion and transport to the plasma  
37 membrane. *The Journal of Biological Chemistry*, 278(19), 17269–17276.  
38 <https://doi.org/10.1074/jbc.M211452200>
- 39 Wakana, Y., Hayashi, K., Nemoto, T., Watanabe, C., Taoka, M., Angulo-Capel, J., Garcia-  
40 Parajo, M. F., Kumata, H., Umemura, T., Inoue, H., Arasaki, K., Campelo, F., & Tagaya,  
41 M. (2021). The ER cholesterol sensor SCAP promotes CARTS biogenesis at ER–Golgi  
42 membrane contact sites. *Journal of Cell Biology*, 220(1).  
43 <https://doi.org/10.1083/jcb.202002150>
- 44 Wakana, Y., van Galen, J., Meissner, F., Scarpa, M., Polishchuk, R. S., Mann, M., &  
45 Malhotra, V. (2012). A new class of carriers that transport selective cargo from the trans  
46 Golgi network to the cell surface. *EMBO Journal*, 31(20), 3976–3990.  
47 <https://doi.org/10.1038/emboj.2012.235>
- 48 Wang, P. Y., Weng, J., & Anderson, R. G. W. (2005). OSBP is a cholesterol-regulated  
49 scaffolding protein in control of ERK1/2 activation. *Science*, 307(5714), 1472–1476.  
50 <https://doi.org/10.1126/science.1107710>
- 51 Wu, H., Carvalho, P., & Voeltz, G. K. (2018). Here, there, and everywhere: The importance  
52 of ER membrane contact sites. *Science*, 361(6401).  
53 <https://doi.org/10.1126/science.aan5835>
- 54 Zhou, Y., Zhou, B., Pache, L., Chang, M., Khodabakhshi, A. H., Tanaseichuk, O., Benner, C.,  
55 & Chanda, S. K. (2019). Metascape provides a biologist-oriented resource for the

Kovács et al. 2021

1 analysis of systems-level datasets. *Nature Communications*, 10(1), 1523.  
2 <https://doi.org/10.1038/s41467-019-09234-6>  
3  
4  
5  
6  
7  
8  
9  
10  
11  
12  
13  
14  
15  
16  
17  
18  
19  
20



**A**

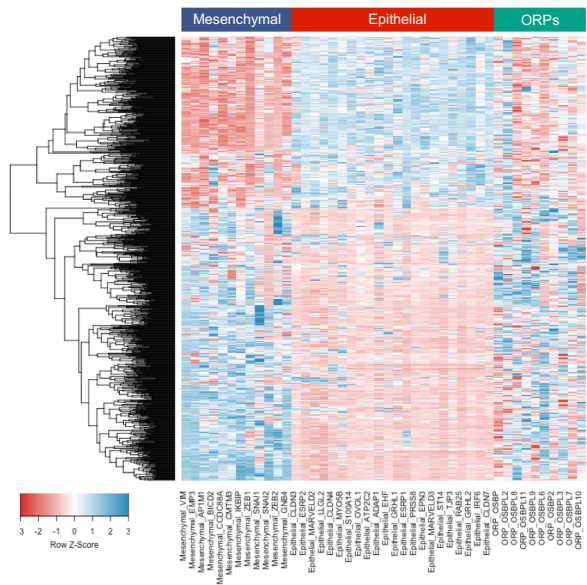

**B**

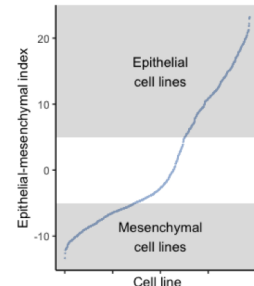

**C**

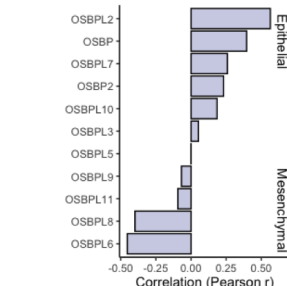

**D**

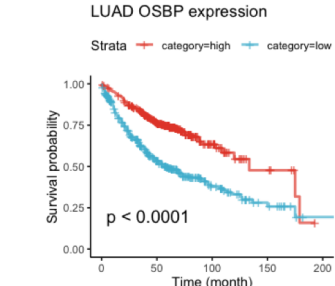

**E**

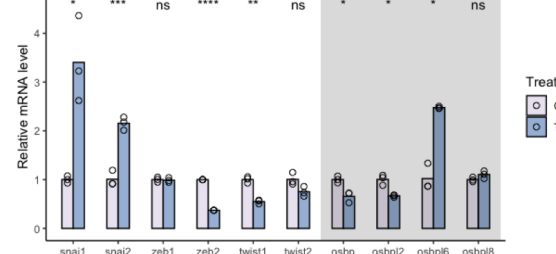

**F**

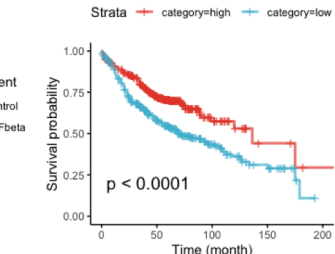

Figure 1.

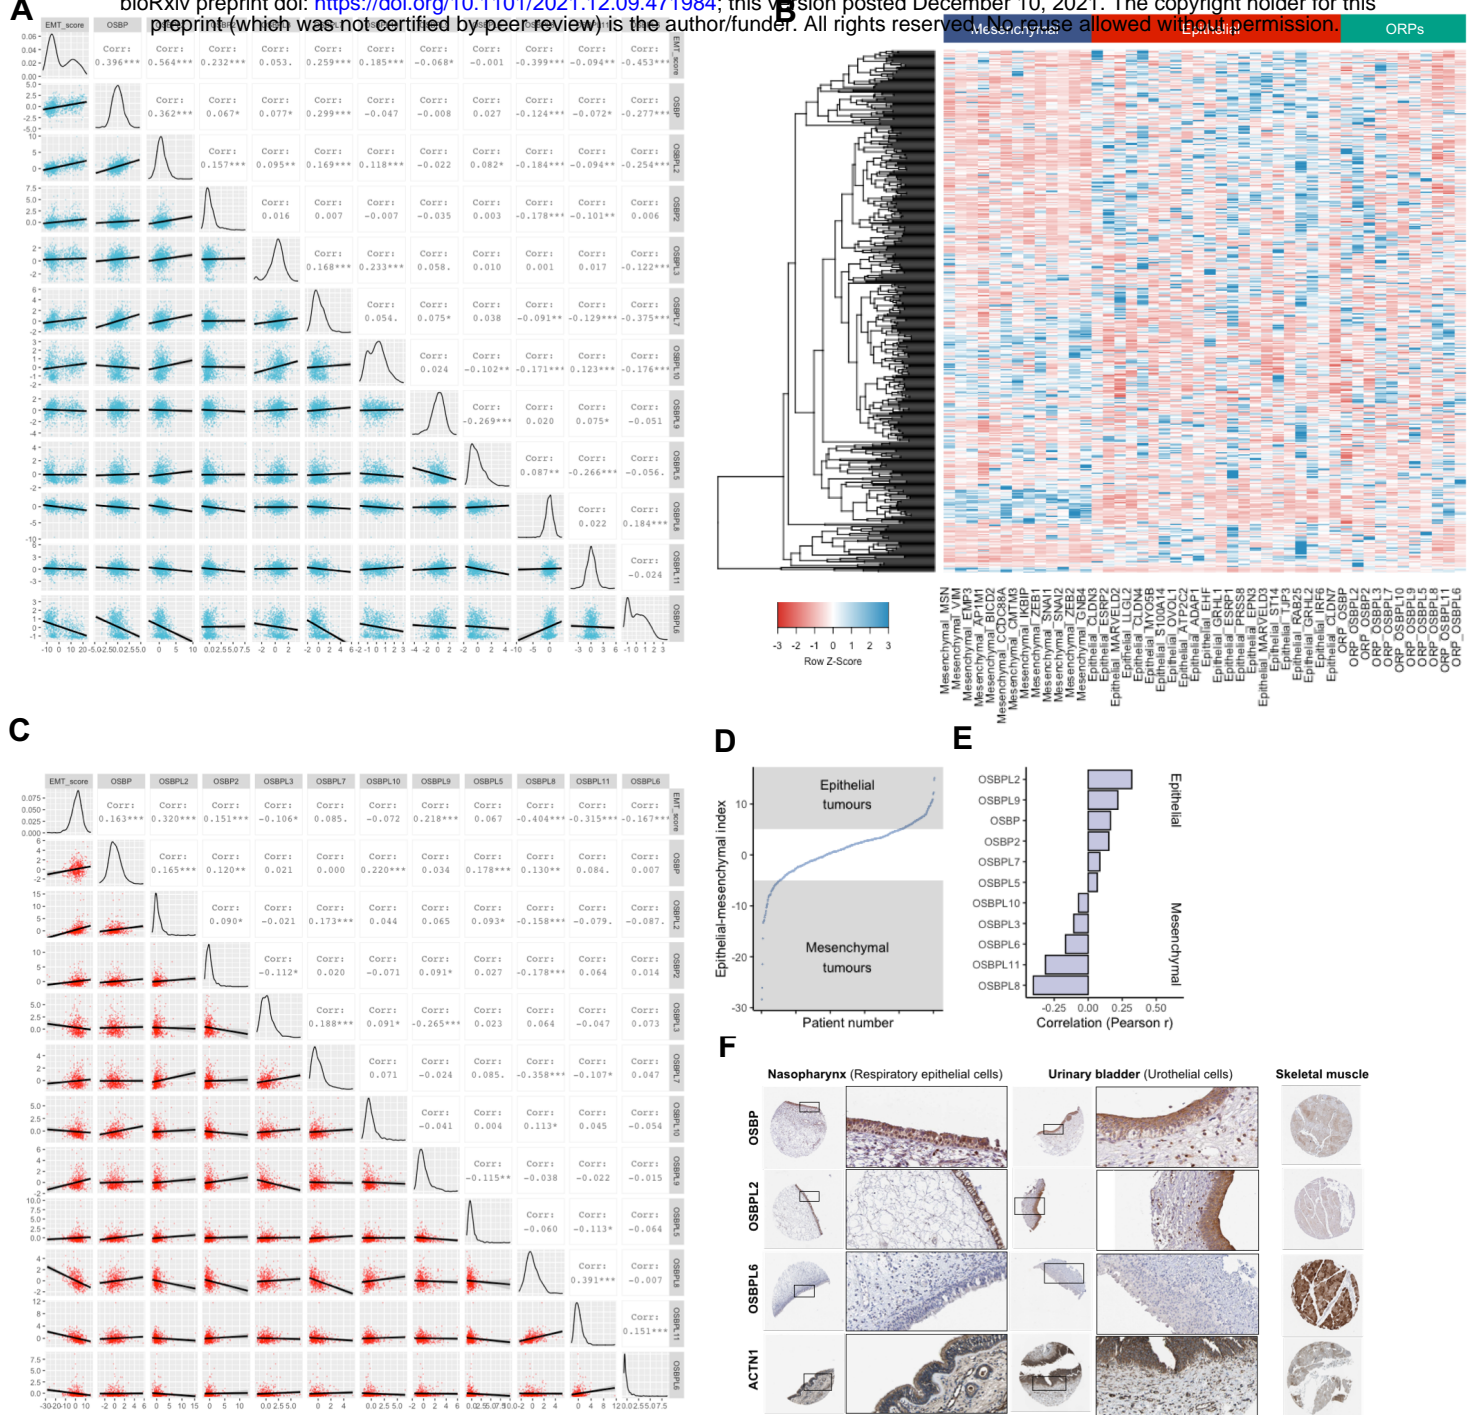

Figure EV1.

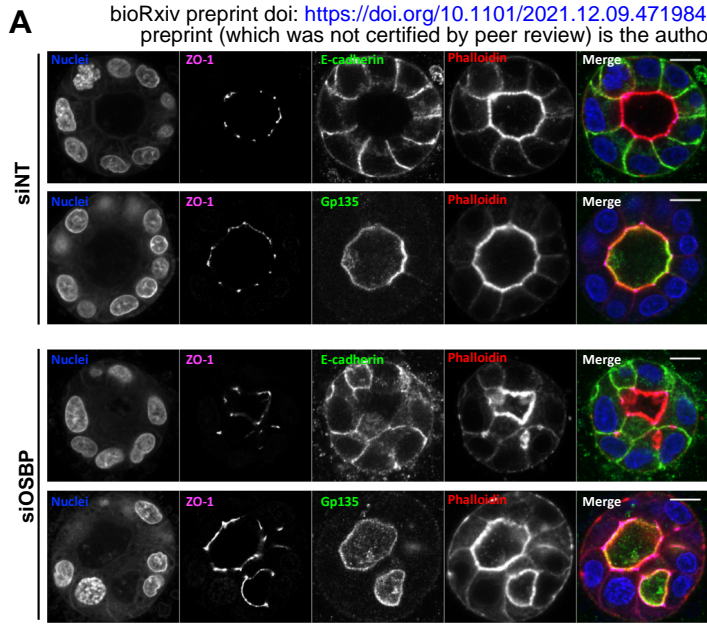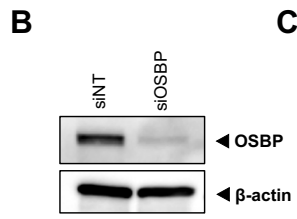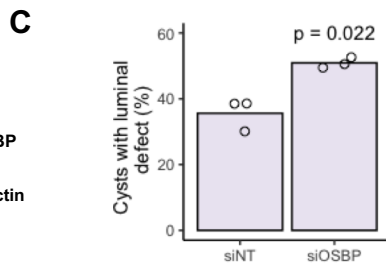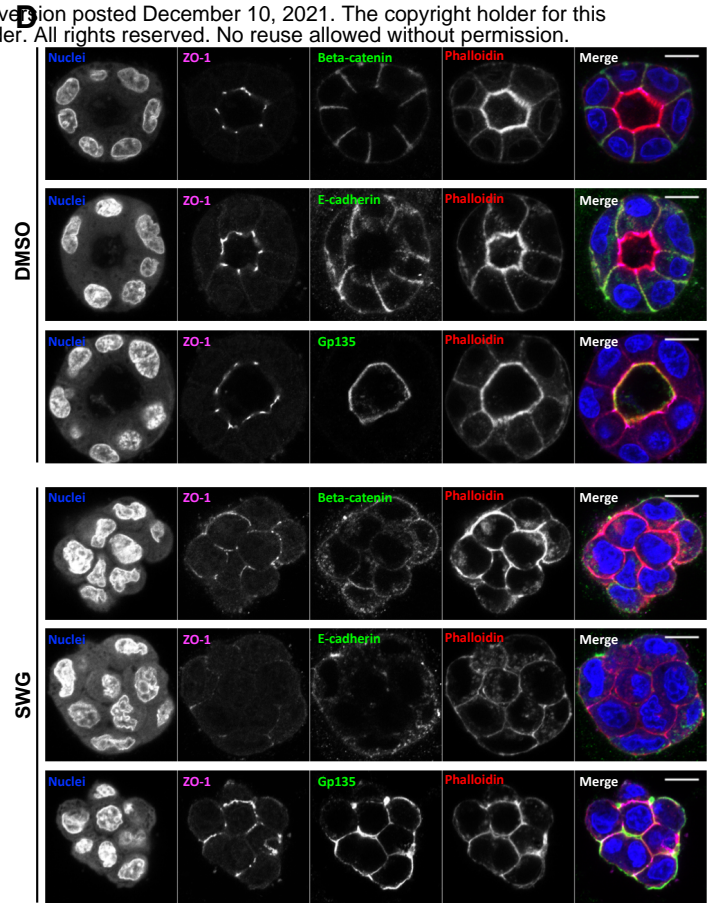

Figure 2.

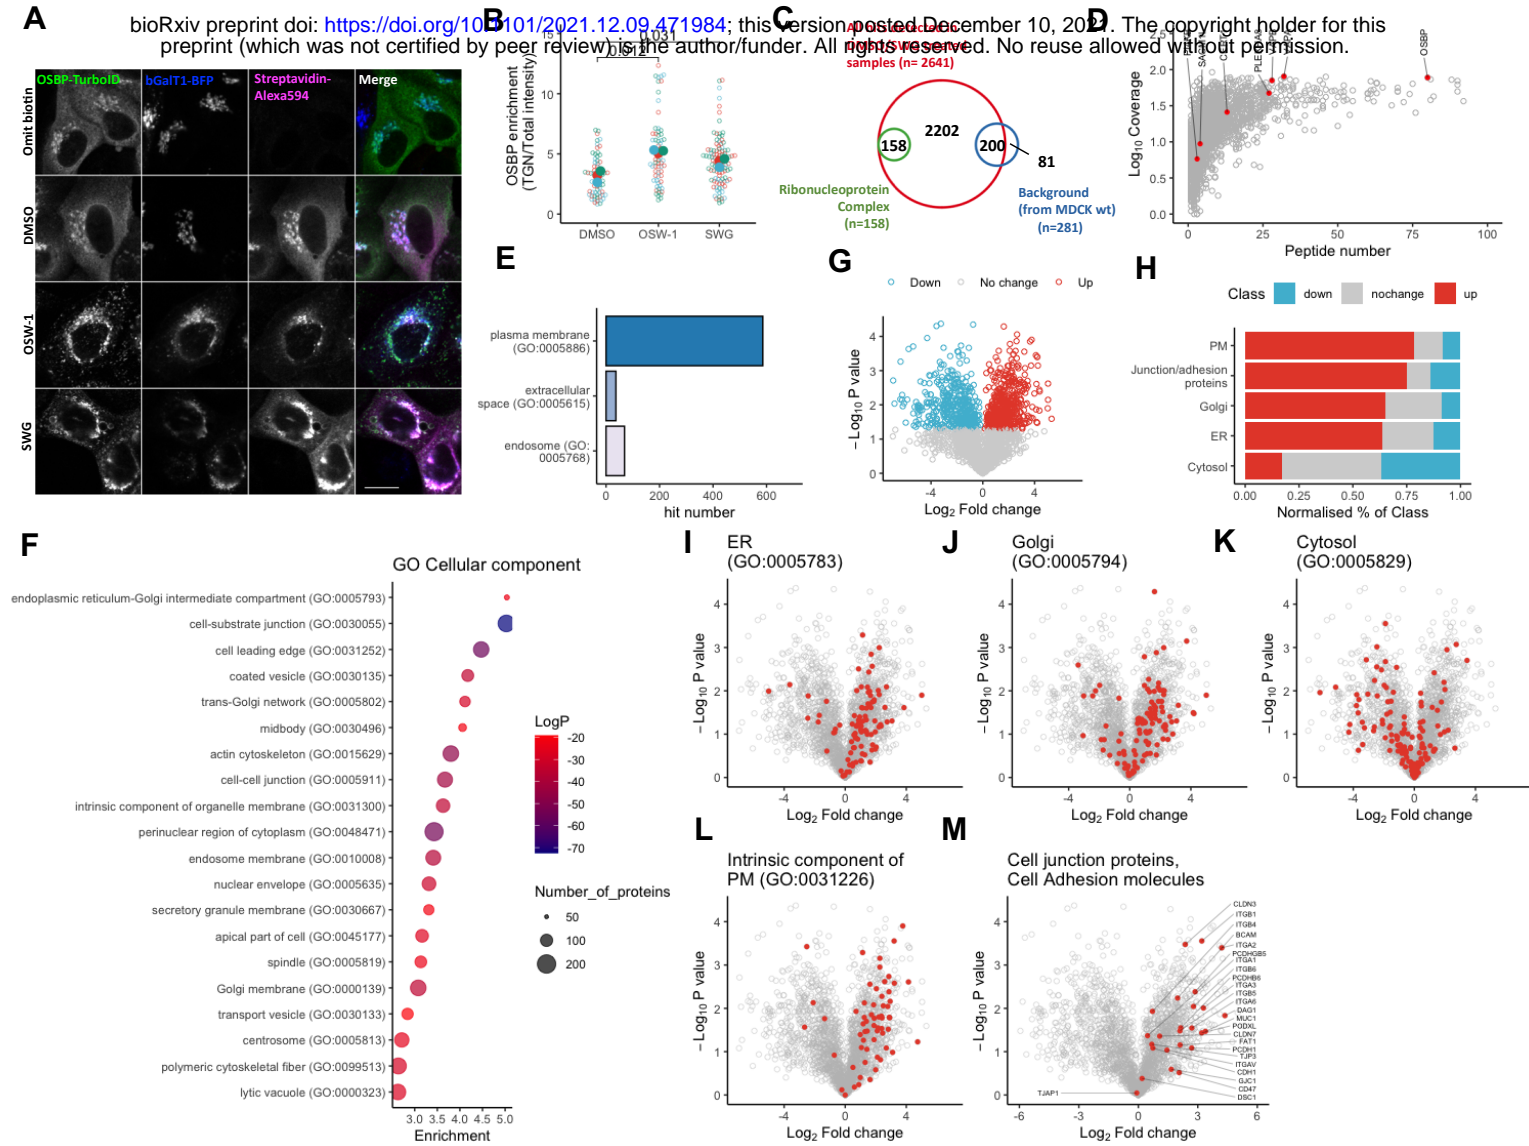

**Figure 3.**

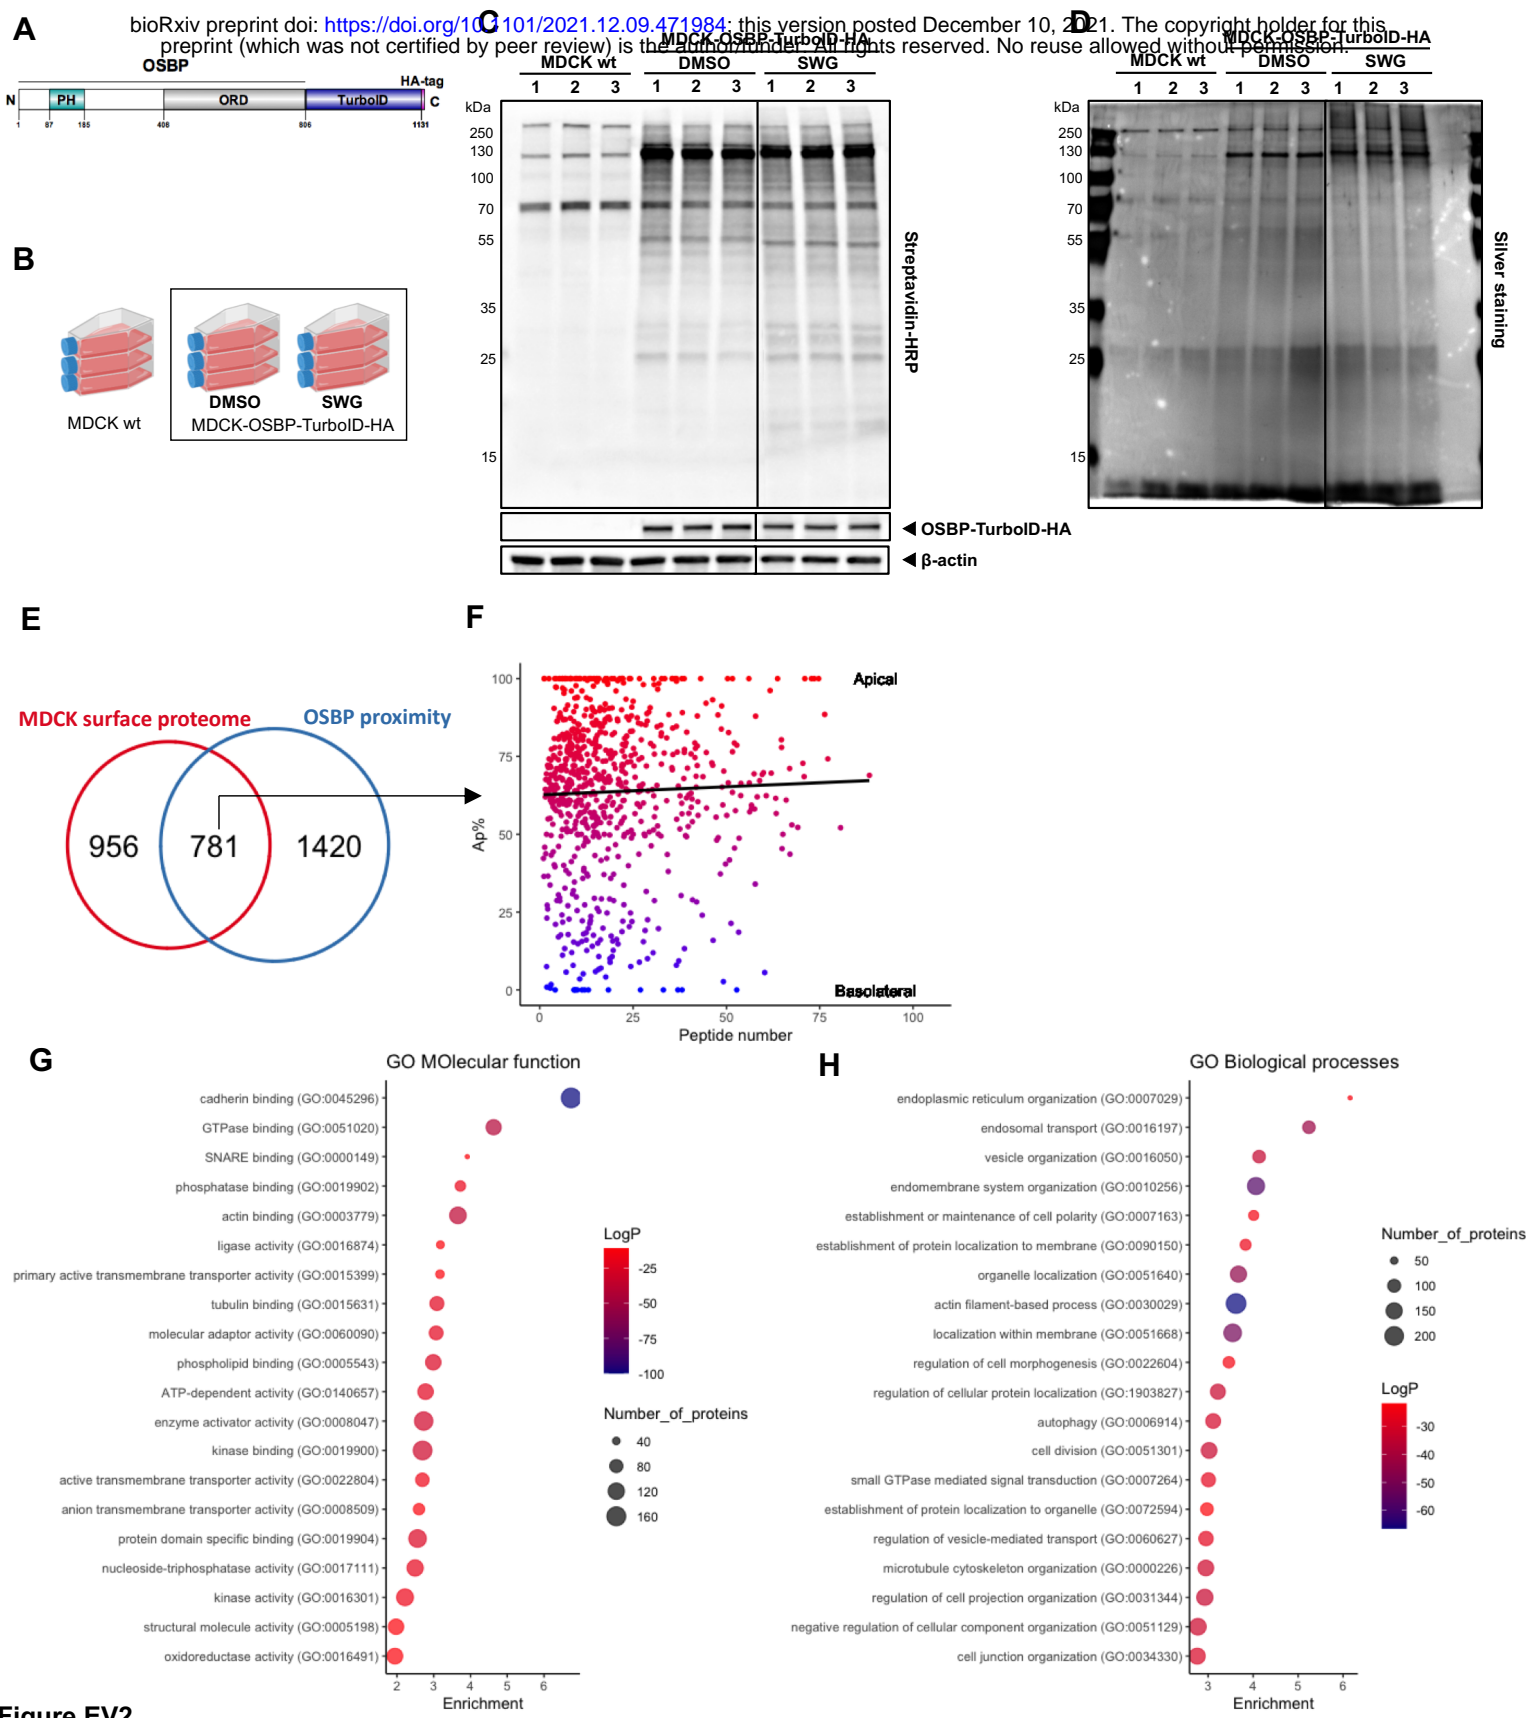

Figure EV2

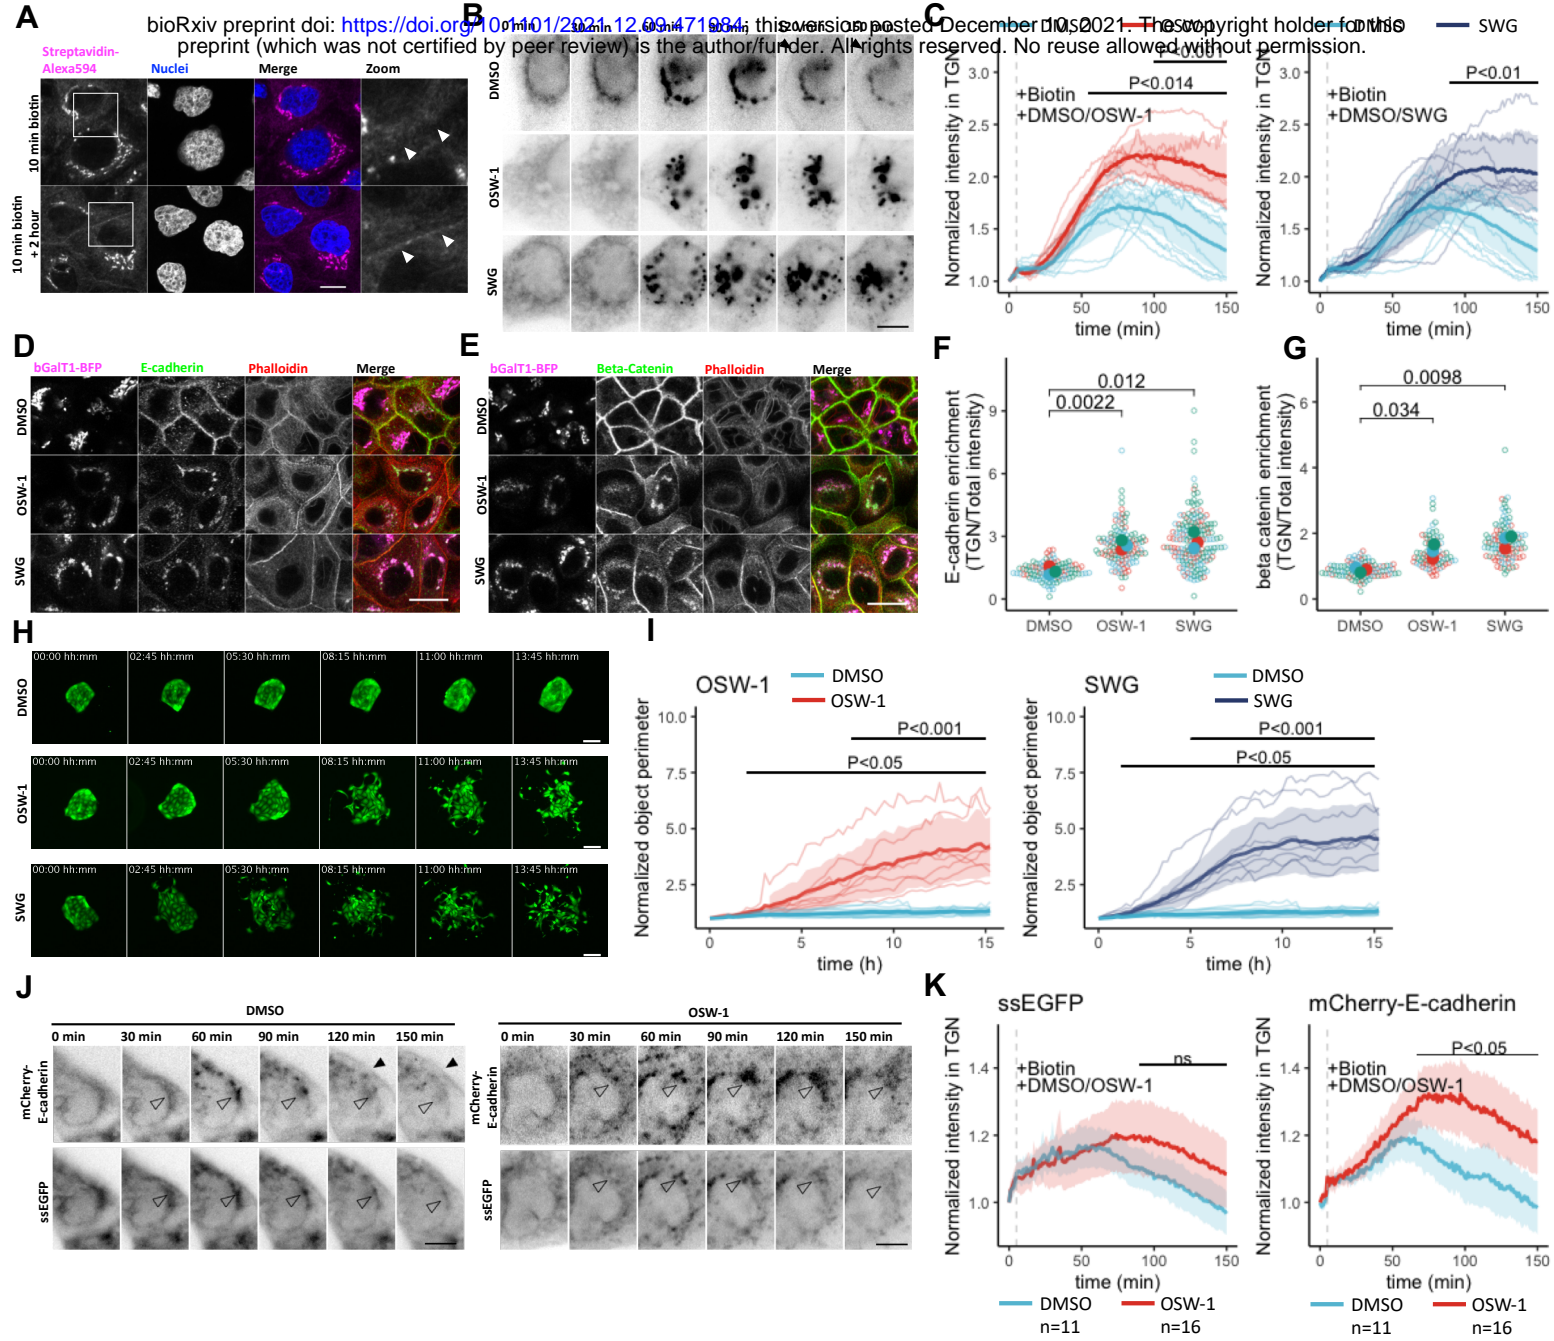

**Figure 4.**

**A**

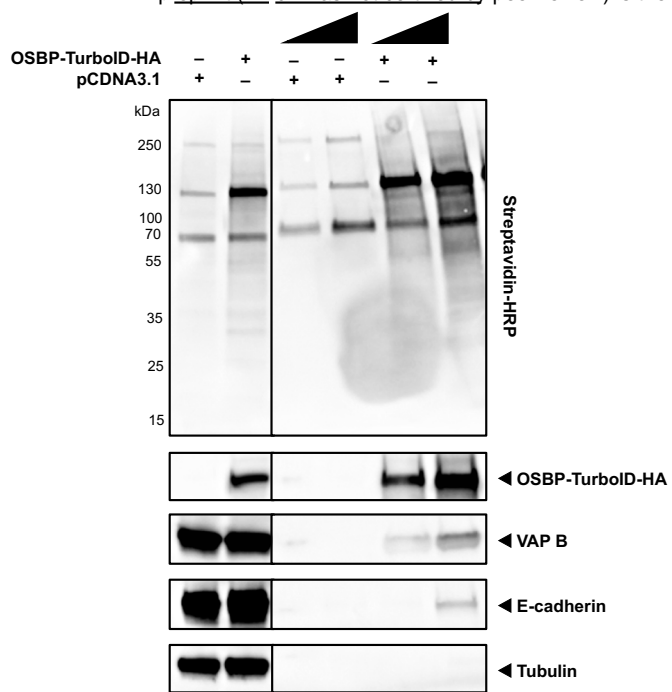

**B**

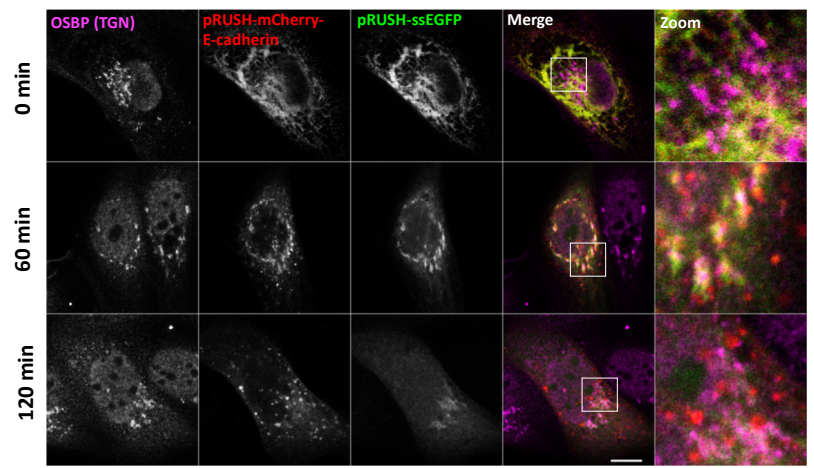

Figure EV3.

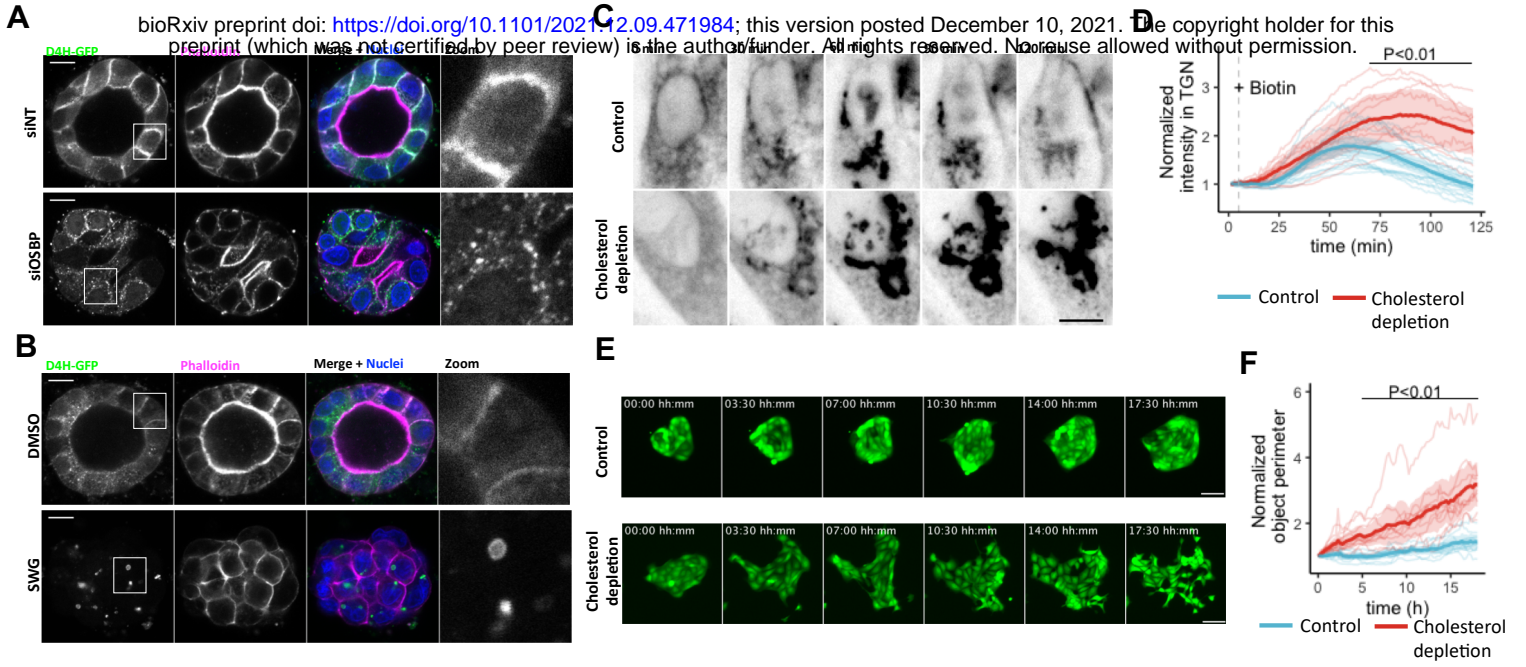

Figure 5.



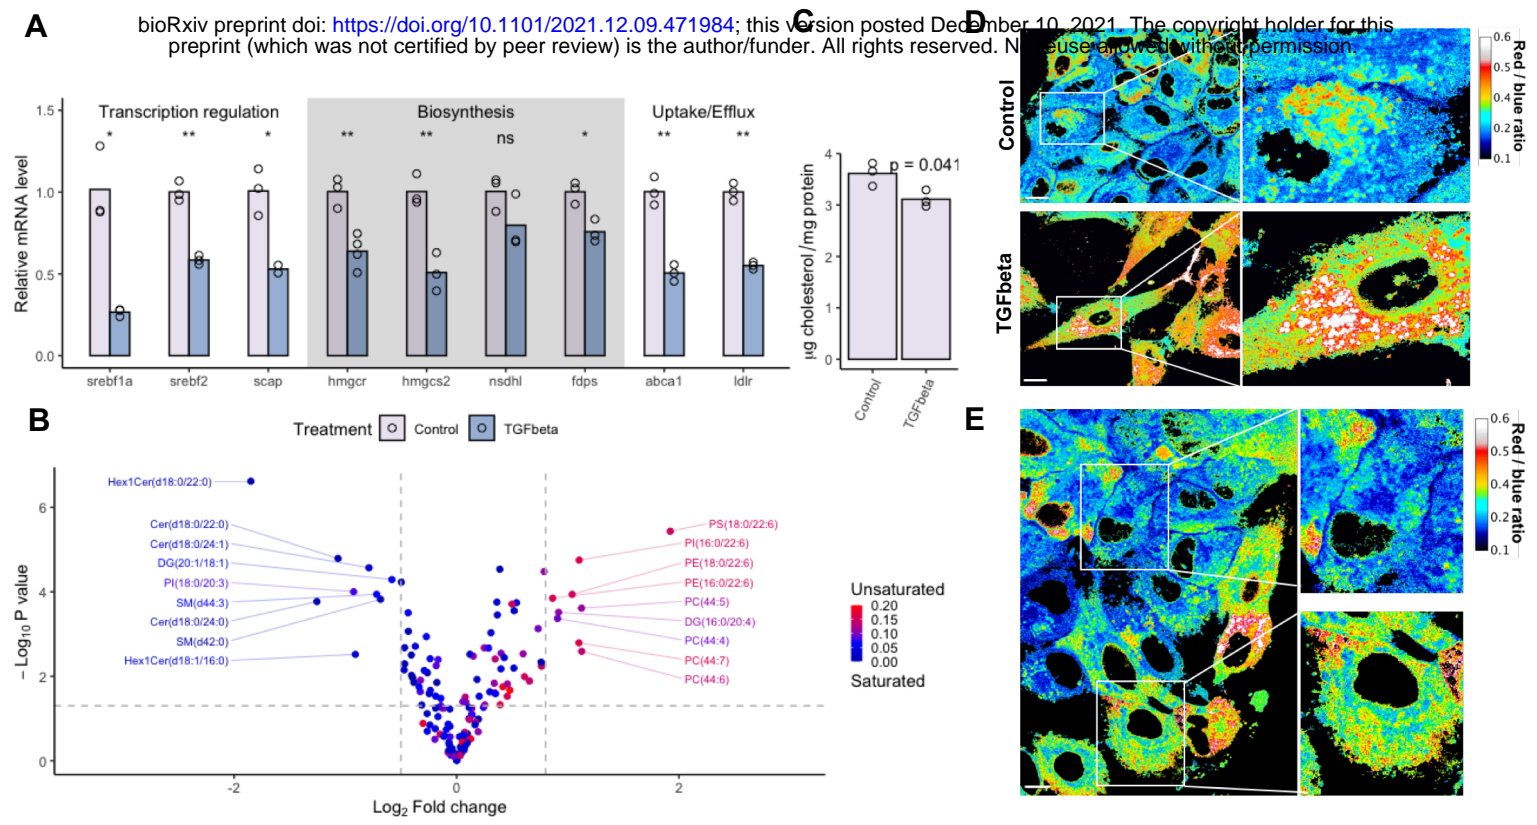

**Figure 6.**

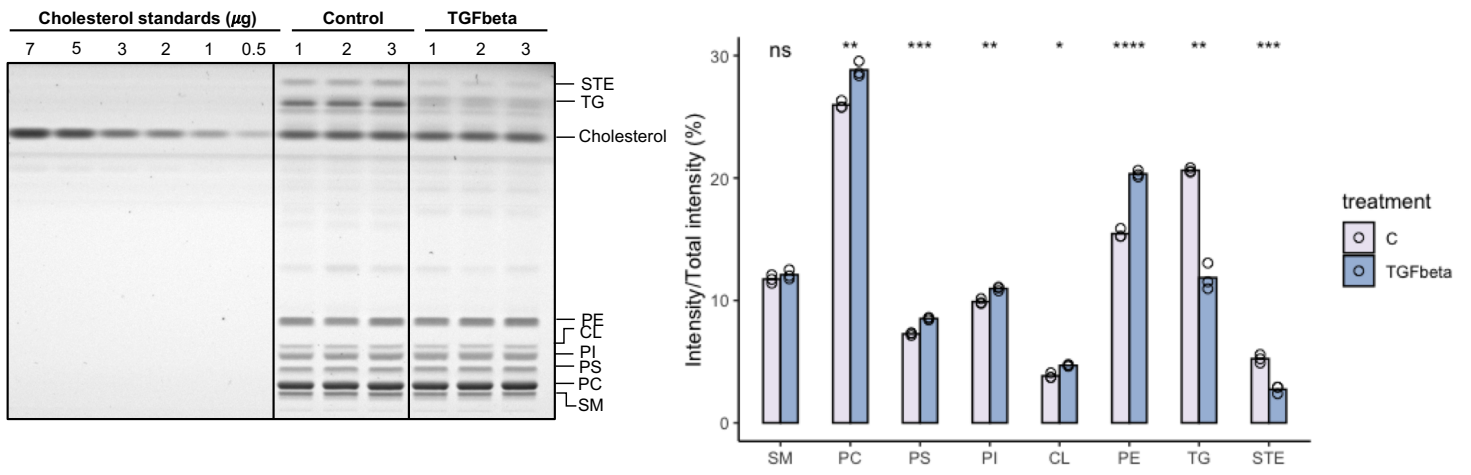

Figure EV4.

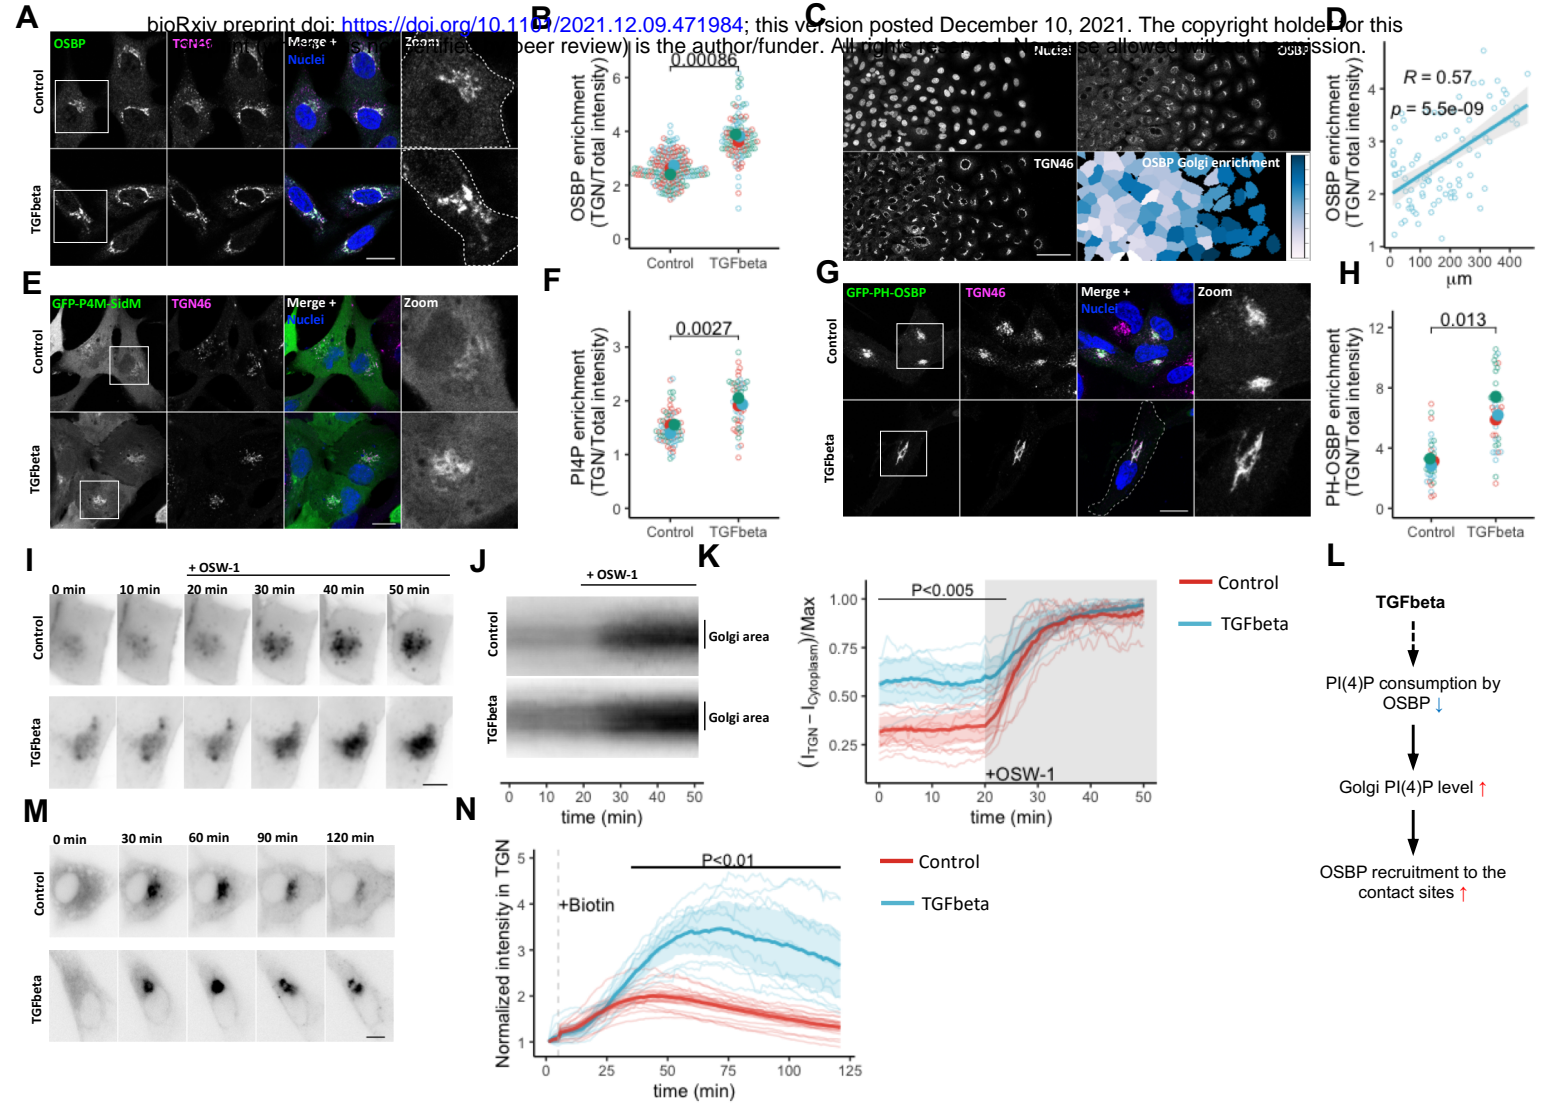

Figure 7.

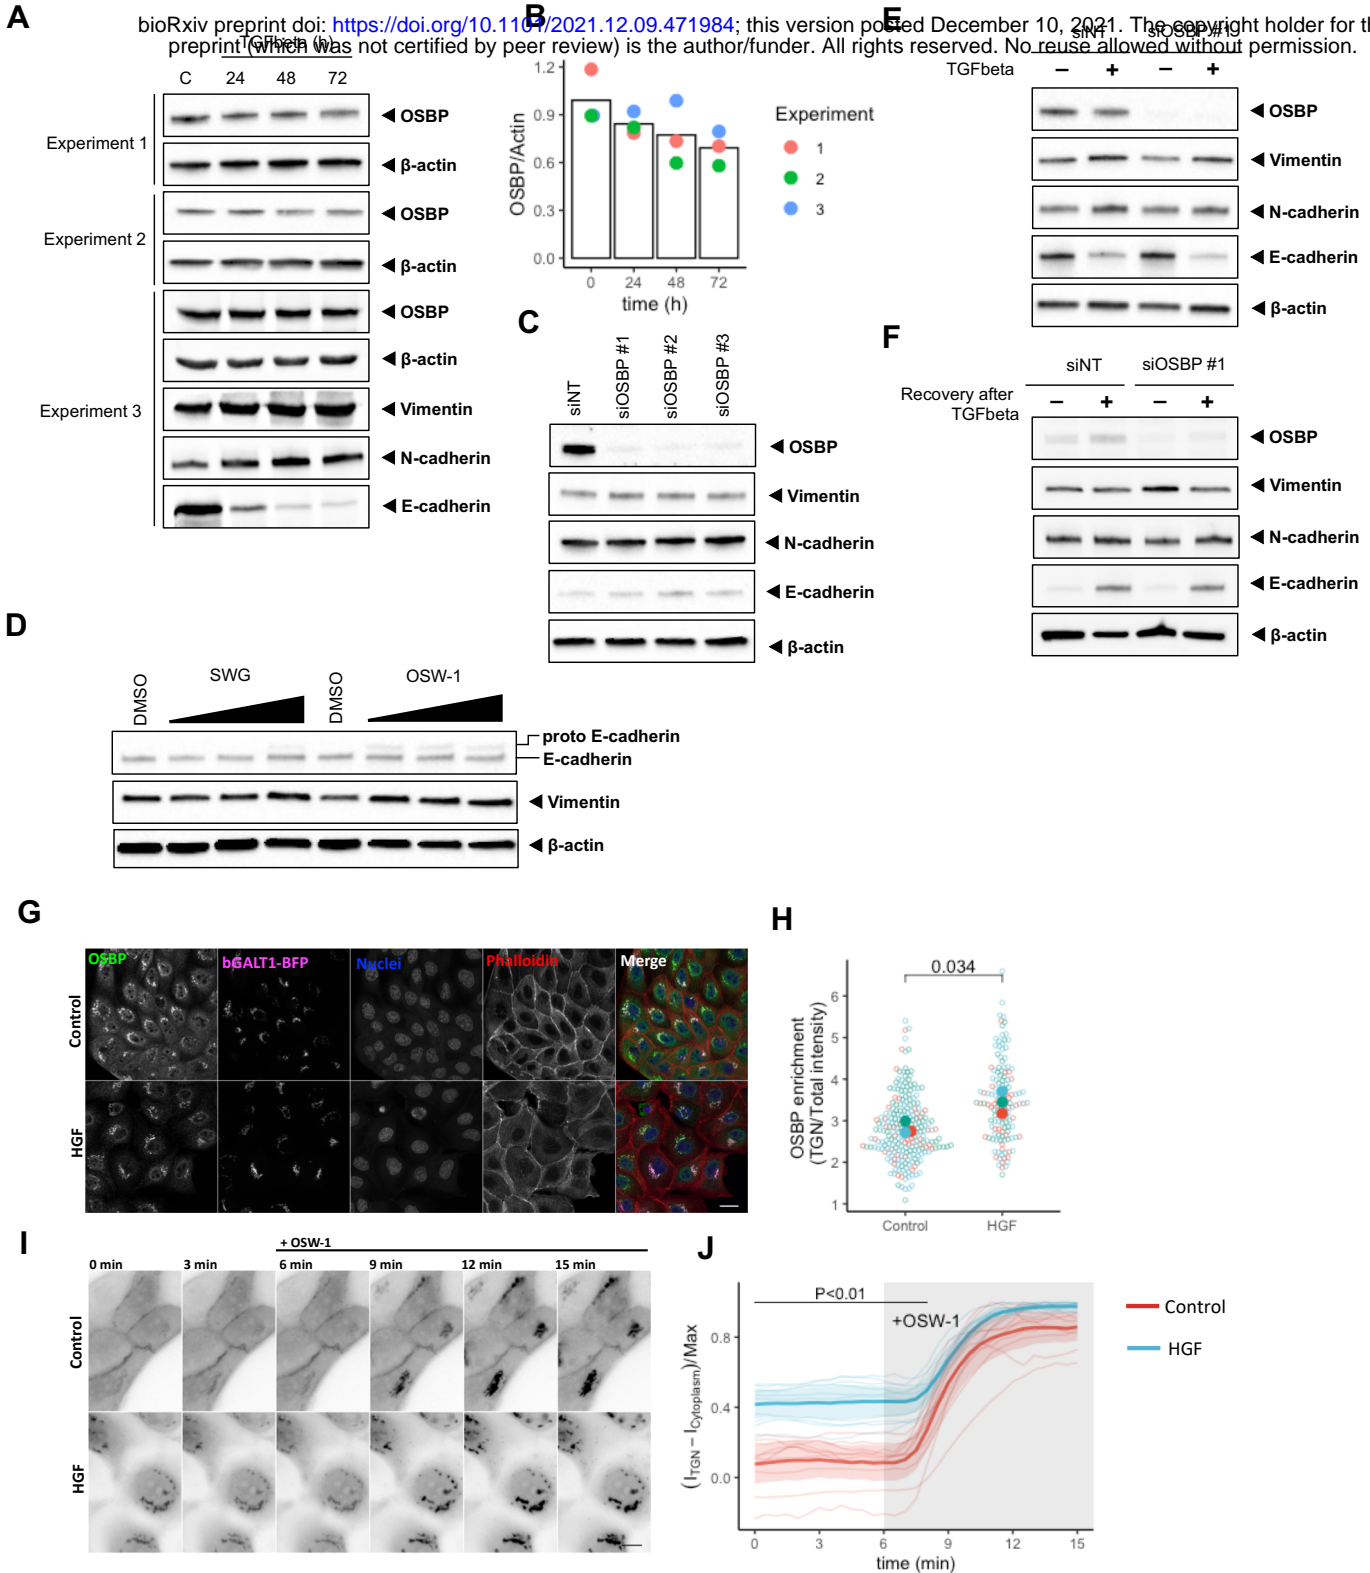

Figure EV5.
